# Supplementary material for: World Checklist of Opiliones species (Arachnida). Part 2: Laniatores – Samooidea, Zalmoxoidea and Grassatores incertae sedis
Source: Biodivers Data J. 2015 Dec 21;(3):e6482. doi: 10.3897/BDJ.3.e6482 (PMC4698464; doi:10.3897/BDJ.3.e6482)
Supplement: Supplementary material 1 — World Checklist of Opiliones species (Arachnida). Part 2: Laniatores – Samooidea, Zalmoxoidea and Grassatores incertae sedis [file biodiversity_data_journal-3-e6482-s001.xlsx]

## Sheet: Plan1
taxonID	type	basisOfRecord	kingdom	phylum	class	order	suborder	superfamily	family	subfamily	genus	specificEpithet	infraspecificEpithet	scientificNameAuthorship	scientificName	taxonRank	realm	taxonomicStatus	rightsHolder
OPIL SP 0001	Checklist	Dataset	Animalia	Arthropoda	Arachnida	Opiliones	Laniatores	Samooidea	Biantidae	Biantinae	Anaceros	anodonta		Lawrence, 1959	Anaceros anodonta Lawrence, 1959	species	Afrotropical	valid	Kury, Adriano B.
OPIL SP 0002	Checklist	Dataset	Animalia	Arthropoda	Arachnida	Opiliones	Laniatores	Samooidea	Biantidae	Biantinae	Anaceros	canidens		Lawrence, 1959	Anaceros canidens Lawrence, 1959	species	Afrotropical	valid	Kury, Adriano B.
OPIL SP 0003	Checklist	Dataset	Animalia	Arthropoda	Arachnida	Opiliones	Laniatores	Samooidea	Biantidae	Biantinae	Anaceros	humilis		Lawrence, 1959	Anaceros humilis Lawrence, 1959	species	Afrotropical	valid	Kury, Adriano B.
OPIL SP 0004	Checklist	Dataset	Animalia	Arthropoda	Arachnida	Opiliones	Laniatores	Samooidea	Biantidae	Biantinae	Anaceros	pauliani		Lawrence, 1959	Anaceros pauliani Lawrence, 1959	species	Afrotropical	valid	Kury, Adriano B.
OPIL SP 0005	Checklist	Dataset	Animalia	Arthropoda	Arachnida	Opiliones	Laniatores	Samooidea	Biantidae	Biantinae	Biantella	reticulata		Roewer, 1927	Biantella reticulata Roewer, 1927	species	Afrotropical	valid	Kury, Adriano B.
OPIL SP 0006	Checklist	Dataset	Animalia	Arthropoda	Arachnida	Opiliones	Laniatores	Samooidea	Biantidae	Biantinae	Biantes	aelleni		Šilhavý 1973	Biantes aelleni Šilhavý 1973	species	Indomalayan	valid	Kury, Adriano B.
OPIL SP 0007	Checklist	Dataset	Animalia	Arthropoda	Arachnida	Opiliones	Laniatores	Samooidea	Biantidae	Biantinae	Biantes	albimanus		(Loman, 1902)	Biantes albimanus (Loman, 1902)	species	Afrotropical	valid	Kury, Adriano B.
OPIL SP 0008	Checklist	Dataset	Animalia	Arthropoda	Arachnida	Opiliones	Laniatores	Samooidea	Biantidae	Biantinae	Biantes	annapurnae		Martens, 1978	Biantes annapurnae Martens, 1978	species	Indomalayan	valid	Kury, Adriano B.
OPIL SP 0009	Checklist	Dataset	Animalia	Arthropoda	Arachnida	Opiliones	Laniatores	Samooidea	Biantidae	Biantinae	Biantes	atroluteus		Roewer, 1915	Biantes atroluteus Roewer, 1915	species	Indomalayan	valid	Kury, Adriano B.
OPIL SP 0010	Checklist	Dataset	Animalia	Arthropoda	Arachnida	Opiliones	Laniatores	Samooidea	Biantidae	Biantinae	Biantes	brevis		Martens, 1978	Biantes brevis Martens, 1978	species	Indomalayan	valid	Kury, Adriano B.
OPIL SP 0011	Checklist	Dataset	Animalia	Arthropoda	Arachnida	Opiliones	Laniatores	Samooidea	Biantidae	Biantinae	Biantes	carli		Roewer, 1929	Biantes carli Roewer, 1929	species	Indomalayan	valid	Kury, Adriano B.
OPIL SP 0012	Checklist	Dataset	Animalia	Arthropoda	Arachnida	Opiliones	Laniatores	Samooidea	Biantidae	Biantinae	Biantes	conspersus		Roewer, 1927	Biantes conspersus Roewer, 1927	species	Indomalayan	valid	Kury, Adriano B.
OPIL SP 0013	Checklist	Dataset	Animalia	Arthropoda	Arachnida	Opiliones	Laniatores	Samooidea	Biantidae	Biantinae	Biantes	dilatatus		Martens, 1978	Biantes dilatatus Martens, 1978	species	Indomalayan	valid	Kury, Adriano B.
OPIL SP 0014	Checklist	Dataset	Animalia	Arthropoda	Arachnida	Opiliones	Laniatores	Samooidea	Biantidae	Biantinae	Biantes	fuscipes		Thorell, 1891	Biantes fuscipes Thorell, 1891	species	Indomalayan	valid	Kury, Adriano B.
OPIL SP 0015	Checklist	Dataset	Animalia	Arthropoda	Arachnida	Opiliones	Laniatores	Samooidea	Biantidae	Biantinae	Biantes	gandaki		Martens, 1978	Biantes gandaki Martens, 1978	species	Indomalayan	valid	Kury, Adriano B.
OPIL SP 0016	Checklist	Dataset	Animalia	Arthropoda	Arachnida	Opiliones	Laniatores	Samooidea	Biantidae	Biantinae	Biantes	gandakoides		Martens, 1978	Biantes gandakoides Martens, 1978	species	Indomalayan	valid	Kury, Adriano B.
OPIL SP 0017	Checklist	Dataset	Animalia	Arthropoda	Arachnida	Opiliones	Laniatores	Samooidea	Biantidae	Biantinae	Biantes	ganesh		Martens, 1978	Biantes ganesh Martens, 1978	species	Indomalayan	valid	Kury, Adriano B.
OPIL SP 0018	Checklist	Dataset	Animalia	Arthropoda	Arachnida	Opiliones	Laniatores	Samooidea	Biantidae	Biantinae	Biantes	godavari		Martens, 1978	Biantes godavari Martens, 1978	species	Indomalayan	valid	Kury, Adriano B.
OPIL SP 0019	Checklist	Dataset	Animalia	Arthropoda	Arachnida	Opiliones	Laniatores	Samooidea	Biantidae	Biantinae	Biantes	gurung		Martens, 1978	Biantes gurung Martens, 1978	species	Indomalayan	valid	Kury, Adriano B.
OPIL SP 0020	Checklist	Dataset	Animalia	Arthropoda	Arachnida	Opiliones	Laniatores	Samooidea	Biantidae	Biantinae	Biantes	jirel		Martens, 1978	Biantes jirel Martens, 1978	species	Indomalayan	valid	Kury, Adriano B.
OPIL SP 0021	Checklist	Dataset	Animalia	Arthropoda	Arachnida	Opiliones	Laniatores	Samooidea	Biantidae	Biantinae	Biantes	kathmandicus		Martens, 1978	Biantes kathmandicus Martens, 1978	species	Indomalayan	valid	Kury, Adriano B.
OPIL SP 0022	Checklist	Dataset	Animalia	Arthropoda	Arachnida	Opiliones	Laniatores	Samooidea	Biantidae	Biantinae	Biantes	lecithodes		Thorell, 1889	Biantes lecithodes Thorell, 1889	species	Indomalayan	valid	Kury, Adriano B.
OPIL SP 0023	Checklist	Dataset	Animalia	Arthropoda	Arachnida	Opiliones	Laniatores	Samooidea	Biantidae	Biantinae	Biantes	longimanus		Simon, 1885	Biantes longimanus Simon, 1885	species	Indomalayan	valid	Kury, Adriano B.
OPIL SP 0024	Checklist	Dataset	Animalia	Arthropoda	Arachnida	Opiliones	Laniatores	Samooidea	Biantidae	Biantinae	Biantes	magar		Martens, 1978	Biantes magar Martens, 1978	species	Indomalayan	valid	Kury, Adriano B.
OPIL SP 0025	Checklist	Dataset	Animalia	Arthropoda	Arachnida	Opiliones	Laniatores	Samooidea	Biantidae	Biantinae	Biantes	minimus		Rambla, 1984	Biantes minimus Rambla, 1984	species	Afrotropical	valid	Kury, Adriano B.
OPIL SP 0026	Checklist	Dataset	Animalia	Arthropoda	Arachnida	Opiliones	Laniatores	Samooidea	Biantidae	Biantinae	Biantes	newar		Martens, 1978	Biantes newar Martens, 1978	species	Indomalayan	valid	Kury, Adriano B.
OPIL SP 0027	Checklist	Dataset	Animalia	Arthropoda	Arachnida	Opiliones	Laniatores	Samooidea	Biantidae	Biantinae	Biantes	pernepalicus		Martens, 1978	Biantes pernepalicus Martens, 1978	species	Indomalayan	valid	Kury, Adriano B.
OPIL SP 0028	Checklist	Dataset	Animalia	Arthropoda	Arachnida	Opiliones	Laniatores	Samooidea	Biantidae	Biantinae	Biantes	quadrituberculatus		Roewer, 1929	Biantes quadrituberculatus Roewer, 1929	species	Indomalayan	valid	Kury, Adriano B.
OPIL SP 0029	Checklist	Dataset	Animalia	Arthropoda	Arachnida	Opiliones	Laniatores	Samooidea	Biantidae	Biantinae	Biantes	rarensis		Martens, 1978	Biantes rarensis Martens, 1978	species	Indomalayan	valid	Kury, Adriano B.
OPIL SP 0030	Checklist	Dataset	Animalia	Arthropoda	Arachnida	Opiliones	Laniatores	Samooidea	Biantidae	Biantinae	Biantes	sherpa		Martens, 1978	Biantes sherpa Martens, 1978	species	Indomalayan	valid	Kury, Adriano B.
OPIL SP 0031	Checklist	Dataset	Animalia	Arthropoda	Arachnida	Opiliones	Laniatores	Samooidea	Biantidae	Biantinae	Biantes	simplex		Martens, 1978	Biantes simplex Martens, 1978	species	Indomalayan	valid	Kury, Adriano B.
OPIL SP 0032	Checklist	Dataset	Animalia	Arthropoda	Arachnida	Opiliones	Laniatores	Samooidea	Biantidae	Biantinae	Biantes	thakkhali		Martens, 1978	Biantes thakkhali Martens, 1978	species	Indomalayan	valid	Kury, Adriano B.
OPIL SP 0033	Checklist	Dataset	Animalia	Arthropoda	Arachnida	Opiliones	Laniatores	Samooidea	Biantidae	Biantinae	Biantes	thamang		Martens, 1978	Biantes thamang Martens, 1978	species	Indomalayan	valid	Kury, Adriano B.
OPIL SP 0034	Checklist	Dataset	Animalia	Arthropoda	Arachnida	Opiliones	Laniatores	Samooidea	Biantidae	Biantinae	Biantes	vitellinus		Thorell, 1891	Biantes vitellinus Thorell, 1891	species	Indomalayan	valid	Kury, Adriano B.
OPIL SP 0035	Checklist	Dataset	Animalia	Arthropoda	Arachnida	Opiliones	Laniatores	Samooidea	Biantidae	Biantinae	Biantessus	nigrotarsus		(Lawrence, 1933)	Biantessus nigrotarsus (Lawrence, 1933)	species	Afrotropical	valid	Kury, Adriano B.
OPIL SP 0036	Checklist	Dataset	Animalia	Arthropoda	Arachnida	Opiliones	Laniatores	Samooidea	Biantidae	Biantinae	Biantessus	vertebralis		(Lawrence, 1933)	Biantessus vertebralis (Lawrence, 1933)	species	Afrotropical	valid	Kury, Adriano B.
OPIL SP 0037	Checklist	Dataset	Animalia	Arthropoda	Arachnida	Opiliones	Laniatores	Samooidea	Biantidae	Biantinae	Biantomma	nigrospinosum		Roewer, 1942	Biantomma nigrospinosum Roewer, 1942	species	Afrotropical	valid	Kury, Adriano B.
OPIL SP 0038	Checklist	Dataset	Animalia	Arthropoda	Arachnida	Opiliones	Laniatores	Samooidea	Biantidae	Biantinae	Clinobiantes	paradoxus		Roewer, 1927	Clinobiantes paradoxus Roewer, 1927	species	Afrotropical	valid	Kury, Adriano B.
OPIL SP 0039	Checklist	Dataset	Animalia	Arthropoda	Arachnida	Opiliones	Laniatores	Samooidea	Biantidae	Biantinae	Cryptobiantes	protector		Kauri, 1961	Cryptobiantes protector Kauri, 1961	species	Afrotropical	valid	Kury, Adriano B.
OPIL SP 0040	Checklist	Dataset	Animalia	Arthropoda	Arachnida	Opiliones	Laniatores	Samooidea	Biantidae	Biantinae	Eubiantes	africanus		Roewer, 1915	Eubiantes africanus Roewer, 1915	species	Afrotropical	valid	Kury, Adriano B.
OPIL SP 0041	Checklist	Dataset	Animalia	Arthropoda	Arachnida	Opiliones	Laniatores	Samooidea	Biantidae	Biantinae	Fageibiantes	bicornis		(Fage, 1946)	Fageibiantes bicornis (Fage, 1946)	species	Afrotropical	valid	Kury, Adriano B.
OPIL SP 0042	Checklist	Dataset	Animalia	Arthropoda	Arachnida	Opiliones	Laniatores	Samooidea	Biantidae	Biantinae	Fageibiantes	bispina		Lawrence, 1959	Fageibiantes bispina Lawrence, 1959	species	Afrotropical	valid	Kury, Adriano B.
OPIL SP 0043	Checklist	Dataset	Animalia	Arthropoda	Arachnida	Opiliones	Laniatores	Samooidea	Biantidae	Biantinae	Hinzuanius	africanus		Pavesi, 1884	Hinzuanius africanus Pavesi, 1884	species	Afrotropical	valid	Kury, Adriano B.
OPIL SP 0044	Checklist	Dataset	Animalia	Arthropoda	Arachnida	Opiliones	Laniatores	Samooidea	Biantidae	Biantinae	Hinzuanius	comorensis		(Roewer, 1949)	Hinzuanius comorensis (Roewer, 1949)	species	Afrotropical	valid	Kury, Adriano B.
OPIL SP 0045	Checklist	Dataset	Animalia	Arthropoda	Arachnida	Opiliones	Laniatores	Samooidea	Biantidae	Biantinae	Hinzuanius	flaviventris		(Pocock 1903)	Hinzuanius flaviventris (Pocock 1903)	species	Afrotropical	valid	Kury, Adriano B.
OPIL SP 0046	Checklist	Dataset	Animalia	Arthropoda	Arachnida	Opiliones	Laniatores	Samooidea	Biantidae	Biantinae	Hinzuanius	gracilis		(Roewer, 1949)	Hinzuanius gracilis (Roewer, 1949)	species	Afrotropical	valid	Kury, Adriano B.
OPIL SP 0047	Checklist	Dataset	Animalia	Arthropoda	Arachnida	Opiliones	Laniatores	Samooidea	Biantidae	Biantinae	Hinzuanius	indicus		(Roewer, 1915)	Hinzuanius indicus (Roewer, 1915)	species	Afrotropical	valid	Kury, Adriano B.
OPIL SP 0048	Checklist	Dataset	Animalia	Arthropoda	Arachnida	Opiliones	Laniatores	Samooidea	Biantidae	Biantinae	Hinzuanius	insulanus		Karsch, 1880	Hinzuanius insulanus Karsch, 1880	species	Afrotropical	valid	Kury, Adriano B.
OPIL SP 0049	Checklist	Dataset	Animalia	Arthropoda	Arachnida	Opiliones	Laniatores	Samooidea	Biantidae	Biantinae	Hinzuanius	littoralis		(Lawrence, 1959)	Hinzuanius littoralis (Lawrence, 1959)	species	Afrotropical	valid	Kury, Adriano B.
OPIL SP 0050	Checklist	Dataset	Animalia	Arthropoda	Arachnida	Opiliones	Laniatores	Samooidea	Biantidae	Biantinae	Hinzuanius	madagassis		(Roewer, 1949)	Hinzuanius madagassis (Roewer, 1949)	species	Afrotropical	valid	Kury, Adriano B.
OPIL SP 0051	Checklist	Dataset	Animalia	Arthropoda	Arachnida	Opiliones	Laniatores	Samooidea	Biantidae	Biantinae	Hinzuanius	mauriticus		Roewer, 1927	Hinzuanius mauriticus Roewer, 1927	species	Afrotropical	valid	Kury, Adriano B.
OPIL SP 0052	Checklist	Dataset	Animalia	Arthropoda	Arachnida	Opiliones	Laniatores	Samooidea	Biantidae	Biantinae	Hinzuanius	milloti		(Fage, 1946)	Hinzuanius milloti (Fage, 1946)	species	Afrotropical	valid	Kury, Adriano B.
OPIL SP 0053	Checklist	Dataset	Animalia	Arthropoda	Arachnida	Opiliones	Laniatores	Samooidea	Biantidae	Biantinae	Hinzuanius	pardalis		(Lawrence, 1959)	Hinzuanius pardalis (Lawrence, 1959)	species	Afrotropical	valid	Kury, Adriano B.
OPIL SP 0054	Checklist	Dataset	Animalia	Arthropoda	Arachnida	Opiliones	Laniatores	Samooidea	Biantidae	Biantinae	Hinzuanius	parvulus		Hirst, 1911	Hinzuanius parvulus Hirst, 1911	species	Afrotropical	valid	Kury, Adriano B.
OPIL SP 0055	Checklist	Dataset	Animalia	Arthropoda	Arachnida	Opiliones	Laniatores	Samooidea	Biantidae	Biantinae	Hinzuanius	pauliani		(Lawrence, 1959)	Hinzuanius pauliani (Lawrence, 1959)	species	Afrotropical	valid	Kury, Adriano B.
OPIL SP 0056	Checklist	Dataset	Animalia	Arthropoda	Arachnida	Opiliones	Laniatores	Samooidea	Biantidae	Biantinae	Hinzuanius	tenebrosus		(Lawrence, 1959)	Hinzuanius tenebrosus (Lawrence, 1959)	species	Afrotropical	valid	Kury, Adriano B.
OPIL SP 0057	Checklist	Dataset	Animalia	Arthropoda	Arachnida	Opiliones	Laniatores	Samooidea	Biantidae	Biantinae	Hinzuanius	vittatus		(Simon, 1885)	Hinzuanius vittatus (Simon, 1885)	species	Afrotropical	valid	Kury, Adriano B.
OPIL SP 0058	Checklist	Dataset	Animalia	Arthropoda	Arachnida	Opiliones	Laniatores	Samooidea	Biantidae	Biantinae	Hirstienus	nanus		(Hirst 1913)	Hirstienus nanus (Hirst 1913)	species	Afrotropical	valid	Kury, Adriano B.
OPIL SP 0059	Checklist	Dataset	Animalia	Arthropoda	Arachnida	Opiliones	Laniatores	Samooidea	Biantidae	Biantinae	Hovanoceros	bison		Lawrence, 1959	Hovanoceros bison Lawrence, 1959	species	Afrotropical	valid	Kury, Adriano B.
OPIL SP 0060	Checklist	Dataset	Animalia	Arthropoda	Arachnida	Opiliones	Laniatores	Samooidea	Biantidae	Biantinae	Ivobiantes	spinipalpis		Lawrence, 1965	Ivobiantes spinipalpis Lawrence, 1965	species	Afrotropical	valid	Kury, Adriano B.
OPIL SP 0061	Checklist	Dataset	Animalia	Arthropoda	Arachnida	Opiliones	Laniatores	Samooidea	Biantidae	Biantinae	Malgaceros	boviceps		Lawrence, 1959	Malgaceros boviceps Lawrence, 1959	species	Afrotropical	valid	Kury, Adriano B.
OPIL SP 0062	Checklist	Dataset	Animalia	Arthropoda	Arachnida	Opiliones	Laniatores	Samooidea	Biantidae	Biantinae	Metabiantes	armatus		Lawrence, 1962	Metabiantes armatus Lawrence, 1962	species	Afrotropical	valid	Kury, Adriano B.
OPIL SP 0063	Checklist	Dataset	Animalia	Arthropoda	Arachnida	Opiliones	Laniatores	Samooidea	Biantidae	Biantinae	Metabiantes	barbertonensis		Lawrence, 1963	Metabiantes barbertonensis Lawrence, 1963	species	Afrotropical	valid	Kury, Adriano B.
OPIL SP 0064	Checklist	Dataset	Animalia	Arthropoda	Arachnida	Opiliones	Laniatores	Samooidea	Biantidae	Biantinae	Metabiantes	basutoanus		Kauri, 1961	Metabiantes basutoanus Kauri, 1961	species	Afrotropical	valid	Kury, Adriano B.
OPIL SP 0065	Checklist	Dataset	Animalia	Arthropoda	Arachnida	Opiliones	Laniatores	Samooidea	Biantidae	Biantinae	Metabiantes	cataracticus		Kauri, 1961	Metabiantes cataracticus Kauri, 1961	species	Afrotropical	valid	Kury, Adriano B.
OPIL SP 0066	Checklist	Dataset	Animalia	Arthropoda	Arachnida	Opiliones	Laniatores	Samooidea	Biantidae	Biantinae	Metabiantes	convexus		Roewer, 1949	Metabiantes convexus Roewer, 1949	species	Afrotropical	valid	Kury, Adriano B.
OPIL SP 0067	Checklist	Dataset	Animalia	Arthropoda	Arachnida	Opiliones	Laniatores	Samooidea	Biantidae	Biantinae	Metabiantes	filipes		(Roewer, 1912)	Metabiantes filipes (Roewer, 1912)	species	Afrotropical	valid	Kury, Adriano B.
OPIL SP 0068	Checklist	Dataset	Animalia	Arthropoda	Arachnida	Opiliones	Laniatores	Samooidea	Biantidae	Biantinae	Metabiantes	flavus		Lawrence, 1949	Metabiantes flavus Lawrence, 1949	species	Afrotropical	valid	Kury, Adriano B.
OPIL SP 0069	Checklist	Dataset	Animalia	Arthropoda	Arachnida	Opiliones	Laniatores	Samooidea	Biantidae	Biantinae	Metabiantes	hanstroemi		Kauri, 1961	Metabiantes hanstroemi Kauri, 1961	species	Afrotropical	valid	Kury, Adriano B.
OPIL SP 0070	Checklist	Dataset	Animalia	Arthropoda	Arachnida	Opiliones	Laniatores	Samooidea	Biantidae	Biantinae	Metabiantes	incertus		Kauri, 1961	Metabiantes incertus Kauri, 1961	species	Afrotropical	valid	Kury, Adriano B.
OPIL SP 0071	Checklist	Dataset	Animalia	Arthropoda	Arachnida	Opiliones	Laniatores	Samooidea	Biantidae	Biantinae	Metabiantes	insulanus		(Roewer, 1949)	Metabiantes insulanus (Roewer, 1949)	species	Afrotropical	valid	Kury, Adriano B.
OPIL SP 0072	Checklist	Dataset	Animalia	Arthropoda	Arachnida	Opiliones	Laniatores	Samooidea	Biantidae	Biantinae	Metabiantes	jeanneli		(Roewer, 1913)	Metabiantes jeanneli (Roewer, 1913)	species	Afrotropical	valid	Kury, Adriano B.
OPIL SP 0073	Checklist	Dataset	Animalia	Arthropoda	Arachnida	Opiliones	Laniatores	Samooidea	Biantidae	Biantinae	Metabiantes	kakololius		Kauri, 1985	Metabiantes kakololius Kauri, 1985	species	Afrotropical	valid	Kury, Adriano B.
OPIL SP 0074	Checklist	Dataset	Animalia	Arthropoda	Arachnida	Opiliones	Laniatores	Samooidea	Biantidae	Biantinae	Metabiantes	kosibaiensis		Kauri, 1961	Metabiantes kosibaiensis Kauri, 1961	species	Afrotropical	valid	Kury, Adriano B.
OPIL SP 0075	Checklist	Dataset	Animalia	Arthropoda	Arachnida	Opiliones	Laniatores	Samooidea	Biantidae	Biantinae	Metabiantes	lawrencei		Staręga, 1992	Metabiantes lawrencei Staręga, 1992	species	Afrotropical	valid	Kury, Adriano B.
OPIL SP 0076	Checklist	Dataset	Animalia	Arthropoda	Arachnida	Opiliones	Laniatores	Samooidea	Biantidae	Biantinae	Metabiantes	leighi		(Pocock 1902)	Metabiantes leighi (Pocock 1902)	species	Afrotropical	valid	Kury, Adriano B.
OPIL SP 0077	Checklist	Dataset	Animalia	Arthropoda	Arachnida	Opiliones	Laniatores	Samooidea	Biantidae	Biantinae	Metabiantes	litoralis		Kauri, 1961	Metabiantes litoralis Kauri, 1961	species	Afrotropical	valid	Kury, Adriano B.
OPIL SP 0078	Checklist	Dataset	Animalia	Arthropoda	Arachnida	Opiliones	Laniatores	Samooidea	Biantidae	Biantinae	Metabiantes	longipes		Kauri, 1985	Metabiantes longipes Kauri, 1985	species	Afrotropical	valid	Kury, Adriano B.
OPIL SP 0079	Checklist	Dataset	Animalia	Arthropoda	Arachnida	Opiliones	Laniatores	Samooidea	Biantidae	Biantinae	Metabiantes	machadoi		Lawrence, 1957	Metabiantes machadoi Lawrence, 1957	species	Afrotropical	valid	Kury, Adriano B.
OPIL SP 0080	Checklist	Dataset	Animalia	Arthropoda	Arachnida	Opiliones	Laniatores	Samooidea	Biantidae	Biantinae	Metabiantes	meraculus		(Loman, 1898)	Metabiantes meraculus (Loman, 1898)	species	Afrotropical	valid	Kury, Adriano B.
OPIL SP 0081	Checklist	Dataset	Animalia	Arthropoda	Arachnida	Opiliones	Laniatores	Samooidea	Biantidae	Biantinae	Metabiantes	minutus		Kauri, 1985	Metabiantes minutus Kauri, 1985	species	Afrotropical	valid	Kury, Adriano B.
OPIL SP 0082	Checklist	Dataset	Animalia	Arthropoda	Arachnida	Opiliones	Laniatores	Samooidea	Biantidae	Biantinae	Metabiantes	montanus		Kauri, 1985	Metabiantes montanus Kauri, 1985	species	Afrotropical	valid	Kury, Adriano B.
OPIL SP 0083	Checklist	Dataset	Animalia	Arthropoda	Arachnida	Opiliones	Laniatores	Samooidea	Biantidae	Biantinae	Metabiantes	obscurus		Kauri, 1961	Metabiantes obscurus Kauri, 1961	species	Afrotropical	valid	Kury, Adriano B.
OPIL SP 0084	Checklist	Dataset	Animalia	Arthropoda	Arachnida	Opiliones	Laniatores	Samooidea	Biantidae	Biantinae	Metabiantes	parvulus		Kauri, 1985	Metabiantes parvulus Kauri, 1985	species	Afrotropical	valid	Kury, Adriano B.
OPIL SP 0085	Checklist	Dataset	Animalia	Arthropoda	Arachnida	Opiliones	Laniatores	Samooidea	Biantidae	Biantinae	Metabiantes	perustus		Lawrence, 1963	Metabiantes perustus Lawrence, 1963	species	Afrotropical	valid	Kury, Adriano B.
OPIL SP 0086	Checklist	Dataset	Animalia	Arthropoda	Arachnida	Opiliones	Laniatores	Samooidea	Biantidae	Biantinae	Metabiantes	pumilio		Roewer, 1927	Metabiantes pumilio Roewer, 1927	species	Afrotropical	valid	Kury, Adriano B.
OPIL SP 0087	Checklist	Dataset	Animalia	Arthropoda	Arachnida	Opiliones	Laniatores	Samooidea	Biantidae	Biantinae	Metabiantes	punctatus		(Sørensen, 1910)	Metabiantes punctatus (Sørensen, 1910)	species	Afrotropical	valid	Kury, Adriano B.
OPIL SP 0088	Checklist	Dataset	Animalia	Arthropoda	Arachnida	Opiliones	Laniatores	Samooidea	Biantidae	Biantinae	Metabiantes	pusulosus		(Loman, 1898)	Metabiantes pusulosus (Loman, 1898)	species	Afrotropical	valid	Kury, Adriano B.
OPIL SP 0089	Checklist	Dataset	Animalia	Arthropoda	Arachnida	Opiliones	Laniatores	Samooidea	Biantidae	Biantinae	Metabiantes	rudebecki		Kauri, 1961	Metabiantes rudebecki Kauri, 1961	species	Afrotropical	valid	Kury, Adriano B.
OPIL SP 0090	Checklist	Dataset	Animalia	Arthropoda	Arachnida	Opiliones	Laniatores	Samooidea	Biantidae	Biantinae	Metabiantes	stanleyi		Kauri, 1985	Metabiantes stanleyi Kauri, 1985	species	Afrotropical	valid	Kury, Adriano B.
OPIL SP 0091	Checklist	Dataset	Animalia	Arthropoda	Arachnida	Opiliones	Laniatores	Samooidea	Biantidae	Biantinae	Metabiantes	submontanus		Kauri, 1985	Metabiantes submontanus Kauri, 1985	species	Afrotropical	valid	Kury, Adriano B.
OPIL SP 0092	Checklist	Dataset	Animalia	Arthropoda	Arachnida	Opiliones	Laniatores	Samooidea	Biantidae	Biantinae	Metabiantes	teres		Lawrence, 1963	Metabiantes teres Lawrence, 1963	species	Afrotropical	valid	Kury, Adriano B.
OPIL SP 0093	Checklist	Dataset	Animalia	Arthropoda	Arachnida	Opiliones	Laniatores	Samooidea	Biantidae	Biantinae	Metabiantes	teretipes		Lawrence, 1962	Metabiantes teretipes Lawrence, 1962	species	Afrotropical	valid	Kury, Adriano B.
OPIL SP 0094	Checklist	Dataset	Animalia	Arthropoda	Arachnida	Opiliones	Laniatores	Samooidea	Biantidae	Biantinae	Metabiantes	traegardhi		Kauri, 1961	Metabiantes traegardhi Kauri, 1961	species	Afrotropical	valid	Kury, Adriano B.
OPIL SP 0095	Checklist	Dataset	Animalia	Arthropoda	Arachnida	Opiliones	Laniatores	Samooidea	Biantidae	Biantinae	Metabiantes	trifasciatus		Roewer, 1915	Metabiantes trifasciatus Roewer, 1915	species	Afrotropical	valid	Kury, Adriano B.
OPIL SP 0096	Checklist	Dataset	Animalia	Arthropoda	Arachnida	Opiliones	Laniatores	Samooidea	Biantidae	Biantinae	Metabiantes	ulindinus		Kauri, 1985	Metabiantes ulindinus Kauri, 1985	species	Afrotropical	valid	Kury, Adriano B.
OPIL SP 0097	Checklist	Dataset	Animalia	Arthropoda	Arachnida	Opiliones	Laniatores	Samooidea	Biantidae	Biantinae	Metabiantes	unicolor		(Roewer, 1912)	Metabiantes unicolor (Roewer, 1912)	species	Afrotropical	valid	Kury, Adriano B.
OPIL SP 0098	Checklist	Dataset	Animalia	Arthropoda	Arachnida	Opiliones	Laniatores	Samooidea	Biantidae	Biantinae	Metabiantes	urbanus		Kauri, 1961	Metabiantes urbanus Kauri, 1961	species	Afrotropical	valid	Kury, Adriano B.
OPIL SP 0099	Checklist	Dataset	Animalia	Arthropoda	Arachnida	Opiliones	Laniatores	Samooidea	Biantidae	Biantinae	Metabiantes	varius		Kauri, 1961	Metabiantes varius Kauri, 1961	species	Afrotropical	valid	Kury, Adriano B.
OPIL SP 0100	Checklist	Dataset	Animalia	Arthropoda	Arachnida	Opiliones	Laniatores	Samooidea	Biantidae	Biantinae	Metabiantes	zuluanus		Lawrence, 1937	Metabiantes zuluanus Lawrence, 1937	species	Afrotropical	valid	Kury, Adriano B.
OPIL SP 0101	Checklist	Dataset	Animalia	Arthropoda	Arachnida	Opiliones	Laniatores	Samooidea	Biantidae	Biantinae	Metabiantes	zuurbergianus		Kauri, 1961	Metabiantes zuurbergianus Kauri, 1961	species	Afrotropical	valid	Kury, Adriano B.
OPIL SP 0102	Checklist	Dataset	Animalia	Arthropoda	Arachnida	Opiliones	Laniatores	Samooidea	Biantidae	Biantinae	Monobiantes	benoiti		Lawrence, 1962	Monobiantes benoiti Lawrence, 1962	species	Afrotropical	valid	Kury, Adriano B.
OPIL SP 0103	Checklist	Dataset	Animalia	Arthropoda	Arachnida	Opiliones	Laniatores	Samooidea	Biantidae	Biantinae	Probiantes	croceus		Roewer, 1927	Probiantes croceus Roewer, 1927	species	Indomalayan	valid	Kury, Adriano B.
OPIL SP 0104	Checklist	Dataset	Animalia	Arthropoda	Arachnida	Opiliones	Laniatores	Samooidea	Biantidae	Biantinae	Tetebius	latibunus		Roewer, 1949	Tetebius latibunus Roewer, 1949	species	Afrotropical	valid	Kury, Adriano B.
OPIL SP 0105	Checklist	Dataset	Animalia	Arthropoda	Arachnida	Opiliones	Laniatores	Samooidea	Biantidae	Lacurbsinae	Eulacurbs	paradoxa		Roewer, 1949	Eulacurbs paradoxa Roewer, 1949	species	Afrotropical	valid	Kury, Adriano B.
OPIL SP 0106	Checklist	Dataset	Animalia	Arthropoda	Arachnida	Opiliones	Laniatores	Samooidea	Biantidae	Lacurbsinae	Lacurbs	nigrimana		Roewer, 1912	Lacurbs nigrimana Roewer, 1912	species	Afrotropical	valid	Kury, Adriano B.
OPIL SP 0107	Checklist	Dataset	Animalia	Arthropoda	Arachnida	Opiliones	Laniatores	Samooidea	Biantidae	Lacurbsinae	Lacurbs	spinosa		Sørensen, 1896	Lacurbs spinosa Sørensen, 1896	species	Afrotropical	valid	Kury, Adriano B.
OPIL SP 0108	Checklist	Dataset	Animalia	Arthropoda	Arachnida	Opiliones	Laniatores	Samooidea	Biantidae	Lacurbsinae	Metalacurbs	cornipes		(Roewer, 1958)	Metalacurbs cornipes (Roewer, 1958)	species	Afrotropical	valid	Kury, Adriano B.
OPIL SP 0109	Checklist	Dataset	Animalia	Arthropoda	Arachnida	Opiliones	Laniatores	Samooidea	Biantidae	Lacurbsinae	Metalacurbs	oedipus		(Roewer, 1958)	Metalacurbs oedipus (Roewer, 1958)	species	Afrotropical	valid	Kury, Adriano B.
OPIL SP 0110	Checklist	Dataset	Animalia	Arthropoda	Arachnida	Opiliones	Laniatores	Samooidea	Biantidae	Lacurbsinae	Metalacurbs	simoni		Roewer, 1915	Metalacurbs simoni Roewer, 1915	species	Afrotropical	valid	Kury, Adriano B.
OPIL SP 0111	Checklist	Dataset	Animalia	Arthropoda	Arachnida	Opiliones	Laniatores	Samooidea	Biantidae	Lacurbsinae	Metalacurbs	villiersi		(Roewer, 1953)	Metalacurbs villiersi (Roewer, 1953)	species	Afrotropical	valid	Kury, Adriano B.
OPIL SP 0112	Checklist	Dataset	Animalia	Arthropoda	Arachnida	Opiliones	Laniatores	Samooidea	Biantidae	Lacurbsinae	Prolacurbs	singularis		Roewer, 1949	Prolacurbs singularis Roewer, 1949	species	Afrotropical	valid	Kury, Adriano B.
OPIL SP 0113	Checklist	Dataset	Animalia	Arthropoda	Arachnida	Opiliones	Laniatores	Samooidea	Biantidae	Stenostygninae	Bidoma	indivisum		Šilhavý, 1973	Bidoma indivisum Šilhavý, 1973	species	Neotropical	valid	Kury, Adriano B.
OPIL SP 0114	Checklist	Dataset	Animalia	Arthropoda	Arachnida	Opiliones	Laniatores	Samooidea	Biantidae	Stenostygninae	Caribbiantes	cubanus		Šilhavý, 1973	Caribbiantes cubanus Šilhavý, 1973	species	Neotropical	valid	Kury, Adriano B.
OPIL SP 0115	Checklist	Dataset	Animalia	Arthropoda	Arachnida	Opiliones	Laniatores	Samooidea	Biantidae	Stenostygninae	Decuella	cubaorientalis		Avram, 1977	Decuella cubaorientalis Avram, 1977	species	Neotropical	valid	Kury, Adriano B.
OPIL SP 0116	Checklist	Dataset	Animalia	Arthropoda	Arachnida	Opiliones	Laniatores	Samooidea	Biantidae	Stenostygninae	Galibrotus	carlotanus		Šilhavý, 1973	Galibrotus carlotanus Šilhavý, 1973	species	Neotropical	valid	Kury, Adriano B.
OPIL SP 0117	Checklist	Dataset	Animalia	Arthropoda	Arachnida	Opiliones	Laniatores	Samooidea	Biantidae	Stenostygninae	Galibrotus	matiasis		Avram, 1977	Galibrotus matiasis Avram, 1977	species	Neotropical	valid	Kury, Adriano B.
OPIL SP 0118	Checklist	Dataset	Animalia	Arthropoda	Arachnida	Opiliones	Laniatores	Samooidea	Biantidae	Stenostygninae	Galibrotus	riedeli		Šilhavý, 1973	Galibrotus riedeli Šilhavý, 1973	species	Neotropical	valid	Kury, Adriano B.
OPIL SP 0119	Checklist	Dataset	Animalia	Arthropoda	Arachnida	Opiliones	Laniatores	Samooidea	Biantidae	Stenostygninae	Heterolacurbs	ovalis		Roewer, 1912	Heterolacurbs ovalis Roewer, 1912	species	Neotropical	valid	Kury, Adriano B.
OPIL SP 0120	Checklist	Dataset	Animalia	Arthropoda	Arachnida	Opiliones	Laniatores	Samooidea	Biantidae	Stenostygninae	Heterolacurbs	perezassoi		Alegre & Armas, 2012	Heterolacurbs perezassoi Alegre & Armas, 2012	species	Neotropical	valid	Kury, Adriano B.
OPIL SP 0121	Checklist	Dataset	Animalia	Arthropoda	Arachnida	Opiliones	Laniatores	Samooidea	Biantidae	Stenostygninae	Manahunca	bielawskii		Šilhavý, 1973	Manahunca bielawskii Šilhavý, 1973	species	Neotropical	valid	Kury, Adriano B.
OPIL SP 0122	Checklist	Dataset	Animalia	Arthropoda	Arachnida	Opiliones	Laniatores	Samooidea	Biantidae	Stenostygninae	Manahunca	cuevajibarae		Avram, 1977	Manahunca cuevajibarae Avram, 1977	species	Neotropical	valid	Kury, Adriano B.
OPIL SP 0123	Checklist	Dataset	Animalia	Arthropoda	Arachnida	Opiliones	Laniatores	Samooidea	Biantidae	Stenostygninae	Manahunca	silhavyi		Avram, 1977	Manahunca silhavyi Avram, 1977	species	Neotropical	valid	Kury, Adriano B.
OPIL SP 0124	Checklist	Dataset	Animalia	Arthropoda	Arachnida	Opiliones	Laniatores	Samooidea	Biantidae	Stenostygninae	Negreaella	fundorai		Avram, 1977	Negreaella fundorai Avram, 1977	species	Neotropical	valid	Kury, Adriano B.
OPIL SP 0125	Checklist	Dataset	Animalia	Arthropoda	Arachnida	Opiliones	Laniatores	Samooidea	Biantidae	Stenostygninae	Negreaella	palenquensis		Avram, 1977	Negreaella palenquensis Avram, 1977	species	Neotropical	valid	Kury, Adriano B.
OPIL SP 0126	Checklist	Dataset	Animalia	Arthropoda	Arachnida	Opiliones	Laniatores	Samooidea	Biantidae	Stenostygninae	Negreaella	rioindiocubanicola		Avram, 1977	Negreaella rioindiocubanicola Avram, 1977	species	Neotropical	valid	Kury, Adriano B.
OPIL SP 0127	Checklist	Dataset	Animalia	Arthropoda	Arachnida	Opiliones	Laniatores	Samooidea	Biantidae	Stenostygninae	Negreaella	vinai		Avram, 1977	Negreaella vinai Avram, 1977	species	Neotropical	valid	Kury, Adriano B.
OPIL SP 0128	Checklist	Dataset	Animalia	Arthropoda	Arachnida	Opiliones	Laniatores	Samooidea	Biantidae	Stenostygninae	Negreaella	yumuriensis		Avram, 1977	Negreaella yumuriensis Avram, 1977	species	Neotropical	valid	Kury, Adriano B.
OPIL SP 0129	Checklist	Dataset	Animalia	Arthropoda	Arachnida	Opiliones	Laniatores	Samooidea	Biantidae	Stenostygninae	Stenostygnus	pusio		Simon, 1879	Stenostygnus pusio Simon, 1879	species	Neotropical	valid	Kury, Adriano B.
OPIL SP 0130	Checklist	Dataset	Animalia	Arthropoda	Arachnida	Opiliones	Laniatores	Samooidea	Biantidae	Stenostygninae	Vestitecola	haitensis		Šilhavý, 1973	Vestitecola haitensis Šilhavý, 1973	species	Neotropical	valid	Kury, Adriano B.
OPIL SP 0131	Checklist	Dataset	Animalia	Arthropoda	Arachnida	Opiliones	Laniatores	Samooidea	Biantidae	Zairebiantinae	Zairebiantes	microphthalmus		Kauri, 1985	Zairebiantes microphthalmus Kauri, 1985	species	Afrotropical	valid	Kury, Adriano B.
OPIL SP 0132	Checklist	Dataset	Animalia	Arthropoda	Arachnida	Opiliones	Laniatores	Samooidea	Samoidae		Akdalima	jamaicana		Šilhavý, 1979	Akdalima jamaicana Šilhavý, 1979	species	Neotropical	valid	Kury, Adriano B.
OPIL SP 0133	Checklist	Dataset	Animalia	Arthropoda	Arachnida	Opiliones	Laniatores	Samooidea	Samoidae		Akdalima	vomeroi		Šilhavý, 1977	Akdalima vomeroi Šilhavý, 1977	species	Neotropical	valid	Kury, Adriano B.
OPIL SP 0134	Checklist	Dataset	Animalia	Arthropoda	Arachnida	Opiliones	Laniatores	Samooidea	Samoidae		Arganotus	macrochelis		(Goodnight & Goodnight, 1953)	Arganotus macrochelis (Goodnight & Goodnight, 1953)	species	Neotropical	valid	Kury, Adriano B.
OPIL SP 0135	Checklist	Dataset	Animalia	Arthropoda	Arachnida	Opiliones	Laniatores	Samooidea	Samoidae		Arganotus	robustus		Šilhavý, 1979	Arganotus robustus Šilhavý, 1979	species	Neotropical	valid	Kury, Adriano B.
OPIL SP 0136	Checklist	Dataset	Animalia	Arthropoda	Arachnida	Opiliones	Laniatores	Samooidea	Samoidae		Arganotus	strinatii		Šilhavý, 1979	Arganotus strinatii Šilhavý, 1979	species	Neotropical	valid	Kury, Adriano B.
OPIL SP 0137	Checklist	Dataset	Animalia	Arthropoda	Arachnida	Opiliones	Laniatores	Samooidea	Samoidae		Badessa	ampycoides		Sørensen, 1886	Badessa ampycoides Sørensen, 1886	species	Australasian	valid	Kury, Adriano B.
OPIL SP 0138	Checklist	Dataset	Animalia	Arthropoda	Arachnida	Opiliones	Laniatores	Samooidea	Samoidae		Badessania	metatarsalis		Roewer, 1949	Badessania metatarsalis Roewer, 1949	species	Australasian	valid	Kury, Adriano B.
OPIL SP 0139	Checklist	Dataset	Animalia	Arthropoda	Arachnida	Opiliones	Laniatores	Samooidea	Samoidae		Benoitinus	elegans		Rambla, 1984	Benoitinus elegans Rambla, 1984	species	Afrotropical	valid	Kury, Adriano B.
OPIL SP 0140	Checklist	Dataset	Animalia	Arthropoda	Arachnida	Opiliones	Laniatores	Samooidea	Samoidae		Bichito	pijiguaoensis		González-Sponga, 1998	Bichito pijiguaoensis González-Sponga, 1998	species	Neotropical	valid	Kury, Adriano B.
OPIL SP 0141	Checklist	Dataset	Animalia	Arthropoda	Arachnida	Opiliones	Laniatores	Samooidea	Samoidae		Feretrius	quadrioculatus		(L.Koch, 1865)	Feretrius quadrioculatus (L.Koch, 1865)	species	Australasian	valid	Kury, Adriano B.
OPIL SP 0142	Checklist	Dataset	Animalia	Arthropoda	Arachnida	Opiliones	Laniatores	Samooidea	Samoidae		Fijicolana	tuberculata		Roewer, 1963	Fijicolana tuberculata Roewer, 1963	species	Australasian	valid	Kury, Adriano B.
OPIL SP 0143	Checklist	Dataset	Animalia	Arthropoda	Arachnida	Opiliones	Laniatores	Samooidea	Samoidae		Hummelinckiolus	parvus		Šilhavý, 1979	Hummelinckiolus parvus Šilhavý, 1979	species	Neotropical	valid	Kury, Adriano B.
OPIL SP 0144	Checklist	Dataset	Animalia	Arthropoda	Arachnida	Opiliones	Laniatores	Samooidea	Samoidae		Kalominua	alta		(González-Sponga, 1987)	Kalominua alta (González-Sponga, 1987)	species	Neotropical	valid	Kury, Adriano B.
OPIL SP 0145	Checklist	Dataset	Animalia	Arthropoda	Arachnida	Opiliones	Laniatores	Samooidea	Samoidae		Kalominua	bicolor		Sørensen, 1932	Kalominua bicolor Sørensen, 1932	species	Neotropical	valid	Kury, Adriano B.
OPIL SP 0146	Checklist	Dataset	Animalia	Arthropoda	Arachnida	Opiliones	Laniatores	Samooidea	Samoidae		Kalominua	bromeliaca		(González-Sponga, 1987)	Kalominua bromeliaca (González-Sponga, 1987)	species	Neotropical	valid	Kury, Adriano B.
OPIL SP 0147	Checklist	Dataset	Animalia	Arthropoda	Arachnida	Opiliones	Laniatores	Samooidea	Samoidae		Kalominua	inermichela		(Soares & Avram 1981)	Kalominua inermichela (Soares & Avram 1981)	species	Neotropical	valid	Kury, Adriano B.
OPIL SP 0148	Checklist	Dataset	Animalia	Arthropoda	Arachnida	Opiliones	Laniatores	Samooidea	Samoidae		Kalominua	leonensis		(González-Sponga, 1987)	Kalominua leonensis (González-Sponga, 1987)	species	Neotropical	valid	Kury, Adriano B.
OPIL SP 0149	Checklist	Dataset	Animalia	Arthropoda	Arachnida	Opiliones	Laniatores	Samooidea	Samoidae		Kalominua	manueli		(González-Sponga, 1987)	Kalominua manueli (González-Sponga, 1987)	species	Neotropical	valid	Kury, Adriano B.
OPIL SP 0150	Checklist	Dataset	Animalia	Arthropoda	Arachnida	Opiliones	Laniatores	Samooidea	Samoidae		Kalominua	minuta		(González-Sponga, 1987)	Kalominua minuta (González-Sponga, 1987)	species	Neotropical	valid	Kury, Adriano B.
OPIL SP 0151	Checklist	Dataset	Animalia	Arthropoda	Arachnida	Opiliones	Laniatores	Samooidea	Samoidae		Kalominua	tiarensis		(González-Sponga, 1987)	Kalominua tiarensis (González-Sponga, 1987)	species	Neotropical	valid	Kury, Adriano B.
OPIL SP 0152	Checklist	Dataset	Animalia	Arthropoda	Arachnida	Opiliones	Laniatores	Samooidea	Samoidae		Maracaynatum	cubanum		Šilhavý, 1979	Maracaynatum cubanum Šilhavý, 1979	species	Neotropical	valid	Kury, Adriano B.
OPIL SP 0153	Checklist	Dataset	Animalia	Arthropoda	Arachnida	Opiliones	Laniatores	Samooidea	Samoidae		Maracaynatum	linaresi		(Soares & Avram 1981)	Maracaynatum linaresi (Soares & Avram 1981)	species	Neotropical	valid	Kury, Adriano B.
OPIL SP 0154	Checklist	Dataset	Animalia	Arthropoda	Arachnida	Opiliones	Laniatores	Samooidea	Samoidae		Maracaynatum	mariaeteresae		González-Sponga, 1987	Maracaynatum mariaeteresae González-Sponga, 1987	species	Neotropical	valid	Kury, Adriano B.
OPIL SP 0155	Checklist	Dataset	Animalia	Arthropoda	Arachnida	Opiliones	Laniatores	Samooidea	Samoidae		Maracaynatum	orchidearum		Roewer, 1949	Maracaynatum orchidearum Roewer, 1949	species	Neotropical	valid	Kury, Adriano B.
OPIL SP 0156	Checklist	Dataset	Animalia	Arthropoda	Arachnida	Opiliones	Laniatores	Samooidea	Samoidae		Maracaynatum	stridulans		Šilhavý, 1979	Maracaynatum stridulans Šilhavý, 1979	species	Neotropical	valid	Kury, Adriano B.
OPIL SP 0157	Checklist	Dataset	Animalia	Arthropoda	Arachnida	Opiliones	Laniatores	Samooidea	Samoidae		Maracaynatum	trinidadense		Šilhavý, 1979	Maracaynatum trinidadense Šilhavý, 1979	species	Neotropical	valid	Kury, Adriano B.
OPIL SP 0158	Checklist	Dataset	Animalia	Arthropoda	Arachnida	Opiliones	Laniatores	Samooidea	Samoidae		Maracaynatum	wilmae		González-Sponga, 1989	Maracaynatum wilmae González-Sponga, 1989	species	Neotropical	valid	Kury, Adriano B.
OPIL SP 0159	Checklist	Dataset	Animalia	Arthropoda	Arachnida	Opiliones	Laniatores	Samooidea	Samoidae		Microminua	flava		(González-Sponga, 1987)	Microminua flava (González-Sponga, 1987)	species	Neotropical	valid	Kury, Adriano B.
OPIL SP 0160	Checklist	Dataset	Animalia	Arthropoda	Arachnida	Opiliones	Laniatores	Samooidea	Samoidae		Microminua	parvula		Sørensen, 1932	Microminua parvula Sørensen, 1932	species	Neotropical	valid	Kury, Adriano B.
OPIL SP 0161	Checklist	Dataset	Animalia	Arthropoda	Arachnida	Opiliones	Laniatores	Samooidea	Samoidae		Mitraceras	crassipalpum		Loman, 1902	Mitraceras crassipalpum Loman, 1902	species	Afrotropical	valid	Kury, Adriano B.
OPIL SP 0162	Checklist	Dataset	Animalia	Arthropoda	Arachnida	Opiliones	Laniatores	Samooidea	Samoidae		Mitraceras	pulchrum		Rambla, 1984	Mitraceras pulchrum Rambla, 1984	species	Afrotropical	valid	Kury, Adriano B.
OPIL SP 0163	Checklist	Dataset	Animalia	Arthropoda	Arachnida	Opiliones	Laniatores	Samooidea	Samoidae		Neocynortina	dixoni		Goodnight & Goodnight, 1983	Neocynortina dixoni Goodnight & Goodnight, 1983	species	Neotropical	valid	Kury, Adriano B.
OPIL SP 0164	Checklist	Dataset	Animalia	Arthropoda	Arachnida	Opiliones	Laniatores	Samooidea	Samoidae		Neoorsa	daphne		(Šilhavý, 1979)	Neoorsa daphne (Šilhavý, 1979)	species	Neotropical	valid	Kury, Adriano B.
OPIL SP 0165	Checklist	Dataset	Animalia	Arthropoda	Arachnida	Opiliones	Laniatores	Samooidea	Samoidae		Niquitaia	convexa		González-Sponga, 1999	Niquitaia convexa González-Sponga, 1999	species	Neotropical	valid	Kury, Adriano B.
OPIL SP 0166	Checklist	Dataset	Animalia	Arthropoda	Arachnida	Opiliones	Laniatores	Samooidea	Samoidae		Parasamoa	gressitti		Goodnight & Goodnight, 1957	Parasamoa gressitti Goodnight & Goodnight, 1957	species	Australasian	valid	Kury, Adriano B.
OPIL SP 0167	Checklist	Dataset	Animalia	Arthropoda	Arachnida	Opiliones	Laniatores	Samooidea	Samoidae		Pellobunus	camburalesi		Rambla, 1978	Pellobunus camburalesi Rambla, 1978	species	Neotropical	valid	Kury, Adriano B.
OPIL SP 0168	Checklist	Dataset	Animalia	Arthropoda	Arachnida	Opiliones	Laniatores	Samooidea	Samoidae		Pellobunus	haitiensis		(Šilhavý, 1979)	Pellobunus haitiensis (Šilhavý, 1979)	species	Neotropical	valid	Kury, Adriano B.
OPIL SP 0169	Checklist	Dataset	Animalia	Arthropoda	Arachnida	Opiliones	Laniatores	Samooidea	Samoidae		Pellobunus	insularis		Banks, 1905	Pellobunus insularis Banks, 1905	species	Neotropical	valid	Kury, Adriano B.
OPIL SP 0170	Checklist	Dataset	Animalia	Arthropoda	Arachnida	Opiliones	Laniatores	Samooidea	Samoidae		Pellobunus	insulcatus		(Roewer, 1954)	Pellobunus insulcatus (Roewer, 1954)	species	Neotropical	valid	Kury, Adriano B.
OPIL SP 0171	Checklist	Dataset	Animalia	Arthropoda	Arachnida	Opiliones	Laniatores	Samooidea	Samoidae		Pellobunus	longipalpus		Goodnight & Goodnight, 1947	Pellobunus longipalpus Goodnight & Goodnight, 1947	species	Neotropical	valid	Kury, Adriano B.
OPIL SP 0172	Checklist	Dataset	Animalia	Arthropoda	Arachnida	Opiliones	Laniatores	Samooidea	Samoidae		Pellobunus	trispinatus		Goodnight & Goodnight, 1947	Pellobunus trispinatus Goodnight & Goodnight, 1947	species	Neotropical	valid	Kury, Adriano B.
OPIL SP 0173	Checklist	Dataset	Animalia	Arthropoda	Arachnida	Opiliones	Laniatores	Samooidea	Samoidae		Reventula	amabilis		Šilhavý, 1979	Reventula amabilis Šilhavý, 1979	species	Neotropical	valid	Kury, Adriano B.
OPIL SP 0174	Checklist	Dataset	Animalia	Arthropoda	Arachnida	Opiliones	Laniatores	Samooidea	Samoidae		Samoa	obscura		Sørensen, 1886	Samoa obscura Sørensen, 1886	species	Australasian	valid	Kury, Adriano B.
OPIL SP 0175	Checklist	Dataset	Animalia	Arthropoda	Arachnida	Opiliones	Laniatores	Samooidea	Samoidae		Samoa	sechellana		Rambla, 1984	Samoa sechellana Rambla, 1984	species	Afrotropical	valid	Kury, Adriano B.
OPIL SP 0176	Checklist	Dataset	Animalia	Arthropoda	Arachnida	Opiliones	Laniatores	Samooidea	Samoidae		Samoa	variabilis		Sørensen, 1886	Samoa variabilis Sørensen, 1886	species	Australasian	valid	Kury, Adriano B.
OPIL SP 0177	Checklist	Dataset	Animalia	Arthropoda	Arachnida	Opiliones	Laniatores	Samooidea	Samoidae		Sawaiellus	berlandi		Roewer, 1949	Sawaiellus berlandi Roewer, 1949	species	Australasian	valid	Kury, Adriano B.
OPIL SP 0178	Checklist	Dataset	Animalia	Arthropoda	Arachnida	Opiliones	Laniatores	Samooidea	Samoidae		Vlachiolus	vojtechi		Šilhavý, 1979	Vlachiolus vojtechi Šilhavý, 1979	species	Neotropical	valid	Kury, Adriano B.
OPIL SP 0179	Checklist	Dataset	Animalia	Arthropoda	Arachnida	Opiliones	Laniatores	Samooidea	Samoidae		Zalmoxista	australis		(Sørensen, 1886)	Zalmoxista australis (Sørensen, 1886)	species	Australasian	valid	Kury, Adriano B.
OPIL SP 0180	Checklist	Dataset	Animalia	Arthropoda	Arachnida	Opiliones	Laniatores	Samooidea	Stygnommatidae		Stygnomma	annulipes		(Goodnight & Goodnight, 1947)	Stygnomma annulipes (Goodnight & Goodnight, 1947)	species	Neotropical	valid	Kury, Adriano B.
OPIL SP 0181	Checklist	Dataset	Animalia	Arthropoda	Arachnida	Opiliones	Laniatores	Samooidea	Stygnommatidae		Stygnomma	batatalense		González-Sponga, 2005	Stygnomma batatalense González-Sponga, 2005	species	Neotropical	valid	Kury, Adriano B.
OPIL SP 0182	Checklist	Dataset	Animalia	Arthropoda	Arachnida	Opiliones	Laniatores	Samooidea	Stygnommatidae		Stygnomma	belizense		Goodnight & Goodnight, 1977	Stygnomma belizense Goodnight & Goodnight, 1977	species	Neotropical	valid	Kury, Adriano B.
OPIL SP 0183	Checklist	Dataset	Animalia	Arthropoda	Arachnida	Opiliones	Laniatores	Samooidea	Stygnommatidae		Stygnomma	bispinatum		Goodnight & Goodnight, 1953	Stygnomma bispinatum Goodnight & Goodnight, 1953	species	Neotropical	valid	Kury, Adriano B.
OPIL SP 0184	Checklist	Dataset	Animalia	Arthropoda	Arachnida	Opiliones	Laniatores	Samooidea	Stygnommatidae		Stygnomma	cubiroense		González-Sponga, 2005	Stygnomma cubiroense González-Sponga, 2005	species	Neotropical	valid	Kury, Adriano B.
OPIL SP 0185	Checklist	Dataset	Animalia	Arthropoda	Arachnida	Opiliones	Laniatores	Samooidea	Stygnommatidae		Stygnomma	delicatulum		Rambla, 1976	Stygnomma delicatulum Rambla, 1976	species	Neotropical	valid	Kury, Adriano B.
OPIL SP 0186	Checklist	Dataset	Animalia	Arthropoda	Arachnida	Opiliones	Laniatores	Samooidea	Stygnommatidae		Stygnomma	fiskei		Rambla, 1969	Stygnomma fiskei Rambla, 1969	species	Neotropical	valid	Kury, Adriano B.
OPIL SP 0187	Checklist	Dataset	Animalia	Arthropoda	Arachnida	Opiliones	Laniatores	Samooidea	Stygnommatidae		Stygnomma	fuentesi		González-Sponga, 2005	Stygnomma fuentesi González-Sponga, 2005	species	Neotropical	valid	Kury, Adriano B.
OPIL SP 0188	Checklist	Dataset	Animalia	Arthropoda	Arachnida	Opiliones	Laniatores	Samooidea	Stygnommatidae		Stygnomma	fuhrmanni		Roewer, 1912	Stygnomma fuhrmanni Roewer, 1912	species	Neotropical	valid	Kury, Adriano B.
OPIL SP 0189	Checklist	Dataset	Animalia	Arthropoda	Arachnida	Opiliones	Laniatores	Samooidea	Stygnommatidae		Stygnomma	furvum		González-Sponga, 1987	Stygnomma furvum González-Sponga, 1987	species	Neotropical	valid	Kury, Adriano B.
OPIL SP 0190	Checklist	Dataset	Animalia	Arthropoda	Arachnida	Opiliones	Laniatores	Samooidea	Stygnommatidae		Stygnomma	gracilitibiae		González-Sponga, 1987	Stygnomma gracilitibiae González-Sponga, 1987	species	Neotropical	valid	Kury, Adriano B.
OPIL SP 0191	Checklist	Dataset	Animalia	Arthropoda	Arachnida	Opiliones	Laniatores	Samooidea	Stygnommatidae		Stygnomma	granulosa		(Goodnight & Goodnight, 1977)	Stygnomma granulosa (Goodnight & Goodnight, 1977)	species	Neotropical	valid	Kury, Adriano B.
OPIL SP 0192	Checklist	Dataset	Animalia	Arthropoda	Arachnida	Opiliones	Laniatores	Samooidea	Stygnommatidae		Stygnomma	jajoense		González-Sponga, 2005	Stygnomma jajoense González-Sponga, 2005	species	Neotropical	valid	Kury, Adriano B.
OPIL SP 0193	Checklist	Dataset	Animalia	Arthropoda	Arachnida	Opiliones	Laniatores	Samooidea	Stygnommatidae		Stygnomma	joannae		Rambla, 1976	Stygnomma joannae Rambla, 1976	species	Neotropical	valid	Kury, Adriano B.
OPIL SP 0194	Checklist	Dataset	Animalia	Arthropoda	Arachnida	Opiliones	Laniatores	Samooidea	Stygnommatidae		Stygnomma	larense		González-Sponga, 1987	Stygnomma larense González-Sponga, 1987	species	Neotropical	valid	Kury, Adriano B.
OPIL SP 0195	Checklist	Dataset	Animalia	Arthropoda	Arachnida	Opiliones	Laniatores	Samooidea	Stygnommatidae		Stygnomma	leleupi		Rambla, 1976	Stygnomma leleupi Rambla, 1976	species	Neotropical	valid	Kury, Adriano B.
OPIL SP 0196	Checklist	Dataset	Animalia	Arthropoda	Arachnida	Opiliones	Laniatores	Samooidea	Stygnommatidae		Stygnomma	macrochelae		González-Sponga, 2005	Stygnomma macrochelae González-Sponga, 2005	species	Neotropical	valid	Kury, Adriano B.
OPIL SP 0197	Checklist	Dataset	Animalia	Arthropoda	Arachnida	Opiliones	Laniatores	Samooidea	Stygnommatidae		Stygnomma	monagasiense		Soares & Avram, 1981	Stygnomma monagasiense Soares & Avram, 1981	species	Neotropical	valid	Kury, Adriano B.
OPIL SP 0198	Checklist	Dataset	Animalia	Arthropoda	Arachnida	Opiliones	Laniatores	Samooidea	Stygnommatidae		Stygnomma	ornatum		González-Sponga, 1987	Stygnomma ornatum González-Sponga, 1987	species	Neotropical	valid	Kury, Adriano B.
OPIL SP 0199	Checklist	Dataset	Animalia	Arthropoda	Arachnida	Opiliones	Laniatores	Samooidea	Stygnommatidae		Stygnomma	pecki		Goodnight & Goodnight, 1977	Stygnomma pecki Goodnight & Goodnight, 1977	species	Neotropical	valid	Kury, Adriano B.
OPIL SP 0200	Checklist	Dataset	Animalia	Arthropoda	Arachnida	Opiliones	Laniatores	Samooidea	Stygnommatidae		Stygnomma	planum		Goodnight & Goodnight, 1953	Stygnomma planum Goodnight & Goodnight, 1953	species	Neotropical	valid	Kury, Adriano B.
OPIL SP 0201	Checklist	Dataset	Animalia	Arthropoda	Arachnida	Opiliones	Laniatores	Samooidea	Stygnommatidae		Stygnomma	purpureum		González-Sponga, 1987	Stygnomma purpureum González-Sponga, 1987	species	Neotropical	valid	Kury, Adriano B.
OPIL SP 0202	Checklist	Dataset	Animalia	Arthropoda	Arachnida	Opiliones	Laniatores	Samooidea	Stygnommatidae		Stygnomma	salmeronense		González-Sponga, 2005	Stygnomma salmeronense González-Sponga, 2005	species	Neotropical	valid	Kury, Adriano B.
OPIL SP 0203	Checklist	Dataset	Animalia	Arthropoda	Arachnida	Opiliones	Laniatores	Samooidea	Stygnommatidae		Stygnomma	solisitiens		González-Sponga, 1987	Stygnomma solisitiens González-Sponga, 1987	species	Neotropical	valid	Kury, Adriano B.
OPIL SP 0204	Checklist	Dataset	Animalia	Arthropoda	Arachnida	Opiliones	Laniatores	Samooidea	Stygnommatidae		Stygnomma	spiniferum	bolivari	(Goodnight & Goodnight, 1945)	Stygnomma spiniferum bolivari (Goodnight & Goodnight, 1945)	subspecies	Neotropical	valid	Kury, Adriano B.
OPIL SP 0205	Checklist	Dataset	Animalia	Arthropoda	Arachnida	Opiliones	Laniatores	Samooidea	Stygnommatidae		Stygnomma	spiniferum	spiniferum	(Packard, 1888)	Stygnomma spiniferum spiniferum (Packard, 1888)	subspecies	Neotropical	valid	Kury, Adriano B.
OPIL SP 0206	Checklist	Dataset	Animalia	Arthropoda	Arachnida	Opiliones	Laniatores	Samooidea	Stygnommatidae		Stygnomma	spiniferum	tancahense	Goodnight & Goodnight, 1951	Stygnomma spiniferum tancahense Goodnight & Goodnight, 1951	subspecies	Neotropical	valid	Kury, Adriano B.
OPIL SP 0207	Checklist	Dataset	Animalia	Arthropoda	Arachnida	Opiliones	Laniatores	Samooidea	Stygnommatidae		Stygnomma	spinipalpis		Goodnight & Goodnight, 1953	Stygnomma spinipalpis Goodnight & Goodnight, 1953	species	Neotropical	valid	Kury, Adriano B.
OPIL SP 0208	Checklist	Dataset	Animalia	Arthropoda	Arachnida	Opiliones	Laniatores	Samooidea	Stygnommatidae		Stygnomma	spinula		(Goodnight & Goodnight, 1942)	Stygnomma spinula (Goodnight & Goodnight, 1942)	species	Neotropical	valid	Kury, Adriano B.
OPIL SP 0209	Checklist	Dataset	Animalia	Arthropoda	Arachnida	Opiliones	Laniatores	Samooidea	Stygnommatidae		Stygnomma	teapense		Goodnight & Goodnight, 1951	Stygnomma teapense Goodnight & Goodnight, 1951	species	Neotropical	valid	Kury, Adriano B.
OPIL SP 0210	Checklist	Dataset	Animalia	Arthropoda	Arachnida	Opiliones	Laniatores	Samooidea	Stygnommatidae		Stygnomma	toledense		Goodnight & Goodnight, 1977	Stygnomma toledense Goodnight & Goodnight, 1977	species	Neotropical	valid	Kury, Adriano B.
OPIL SP 0211	Checklist	Dataset	Animalia	Arthropoda	Arachnida	Opiliones	Laniatores	Samooidea	Stygnommatidae		Stygnomma	truxillense		González-Sponga, 1987	Stygnomma truxillense González-Sponga, 1987	species	Neotropical	valid	Kury, Adriano B.
OPIL SP 0212	Checklist	Dataset	Animalia	Arthropoda	Arachnida	Opiliones	Laniatores	Samooidea	Stygnommatidae		Stygnomma	tuberculatum		Goodnight & Goodnight, 1973	Stygnomma tuberculatum Goodnight & Goodnight, 1973	species	Neotropical	valid	Kury, Adriano B.
OPIL SP 0213	Checklist	Dataset	Animalia	Arthropoda	Arachnida	Opiliones	Laniatores	Zalmoxoidea	Escadabiidae		Baculigerus	littoris		H. Soares, 1979	Baculigerus littoris H. Soares, 1979	species	Neotropical	valid	Kury, Adriano B.
OPIL SP 0214	Checklist	Dataset	Animalia	Arthropoda	Arachnida	Opiliones	Laniatores	Zalmoxoidea	Escadabiidae		Brotasus	megalobunus		Roewer, 1928	Brotasus megalobunus Roewer, 1928	species	Neotropical	valid	Kury, Adriano B.
OPIL SP 0215	Checklist	Dataset	Animalia	Arthropoda	Arachnida	Opiliones	Laniatores	Zalmoxoidea	Escadabiidae		Escadabius	schubarti		Roewer, 1949	Escadabius schubarti Roewer, 1949	species	Neotropical	valid	Kury, Adriano B.
OPIL SP 0216	Checklist	Dataset	Animalia	Arthropoda	Arachnida	Opiliones	Laniatores	Zalmoxoidea	Escadabiidae		Escadabius	spinicoxa		Roewer, 1949	Escadabius spinicoxa Roewer, 1949	species	Neotropical	valid	Kury, Adriano B.
OPIL SP 0217	Checklist	Dataset	Animalia	Arthropoda	Arachnida	Opiliones	Laniatores	Zalmoxoidea	Escadabiidae		Escadabius	ventricalcaratus		Roewer, 1949	Escadabius ventricalcaratus Roewer, 1949	species	Neotropical	valid	Kury, Adriano B.
OPIL SP 0218	Checklist	Dataset	Animalia	Arthropoda	Arachnida	Opiliones	Laniatores	Zalmoxoidea	Escadabiidae		Jim	benignus		H. Soares, 1979	Jim benignus H. Soares, 1979	species	Neotropical	valid	Kury, Adriano B.
OPIL SP 0219	Checklist	Dataset	Animalia	Arthropoda	Arachnida	Opiliones	Laniatores	Zalmoxoidea	Escadabiidae		Recifesius	pernambucanus		H. Soares, 1978	Recifesius pernambucanus H. Soares, 1978	species	Neotropical	valid	Kury, Adriano B.
OPIL SP 0220	Checklist	Dataset	Animalia	Arthropoda	Arachnida	Opiliones	Laniatores	Zalmoxoidea	Escadabiidae		Spaeleoleptes	spaeleus		H. Soares, 1966	Spaeleoleptes spaeleus H. Soares, 1966	species	Neotropical	valid	Kury, Adriano B.
OPIL SP 0221	Checklist	Dataset	Animalia	Arthropoda	Arachnida	Opiliones	Laniatores	Zalmoxoidea	Fissiphalliidae		Fissiphallius	chicoi		Tourinho & Pérez-González, 2006	Fissiphallius chicoi Tourinho & Pérez-González, 2006	species	Neotropical	valid	Kury, Adriano B.
OPIL SP 0222	Checklist	Dataset	Animalia	Arthropoda	Arachnida	Opiliones	Laniatores	Zalmoxoidea	Fissiphalliidae		Fissiphallius	martensi		Pinto-da-Rocha, 2004	Fissiphallius martensi Pinto-da-Rocha, 2004	species	Neotropical	valid	Kury, Adriano B.
OPIL SP 0223	Checklist	Dataset	Animalia	Arthropoda	Arachnida	Opiliones	Laniatores	Zalmoxoidea	Fissiphalliidae		Fissiphallius	orube		Polydoro & Pinto-da-Rocha, 2012	Fissiphallius orube Polydoro & Pinto-da-Rocha, 2012	species	Neotropical	valid	Kury, Adriano B.
OPIL SP 0224	Checklist	Dataset	Animalia	Arthropoda	Arachnida	Opiliones	Laniatores	Zalmoxoidea	Fissiphalliidae		Fissiphallius	spinulatus		Martens, 1988	Fissiphallius spinulatus Martens, 1988	species	Neotropical	valid	Kury, Adriano B.
OPIL SP 0225	Checklist	Dataset	Animalia	Arthropoda	Arachnida	Opiliones	Laniatores	Zalmoxoidea	Fissiphalliidae		Fissiphallius	sturmi		Martens, 1988	Fissiphallius sturmi Martens, 1988	species	Neotropical	valid	Kury, Adriano B.
OPIL SP 0226	Checklist	Dataset	Animalia	Arthropoda	Arachnida	Opiliones	Laniatores	Zalmoxoidea	Fissiphalliidae		Fissiphallius	sympatricus		Martens, 1988	Fissiphallius sympatricus Martens, 1988	species	Neotropical	valid	Kury, Adriano B.
OPIL SP 0227	Checklist	Dataset	Animalia	Arthropoda	Arachnida	Opiliones	Laniatores	Zalmoxoidea	Fissiphalliidae		Fissiphallius	tucupi		Tourinho & Pérez-González, 2006	Fissiphallius tucupi Tourinho & Pérez-González, 2006	species	Neotropical	valid	Kury, Adriano B.
OPIL SP 0228	Checklist	Dataset	Animalia	Arthropoda	Arachnida	Opiliones	Laniatores	Zalmoxoidea	Guasiniidae		Guaiquinimia	longipes		González-Sponga, 1997	Guaiquinimia longipes González-Sponga, 1997	species	Neotropical	valid	Kury, Adriano B.
OPIL SP 0229	Checklist	Dataset	Animalia	Arthropoda	Arachnida	Opiliones	Laniatores	Zalmoxoidea	Guasiniidae		Guasinia	delgadoi		González-Sponga, 1997	Guasinia delgadoi González-Sponga, 1997	species	Neotropical	valid	Kury, Adriano B.
OPIL SP 0230	Checklist	Dataset	Animalia	Arthropoda	Arachnida	Opiliones	Laniatores	Zalmoxoidea	Guasiniidae		Guasinia	persephone		Pinto-da-Rocha & Kury, 2003	Guasinia persephone Pinto-da-Rocha & Kury, 2003	species	Neotropical	valid	Kury, Adriano B.
OPIL SP 0231	Checklist	Dataset	Animalia	Arthropoda	Arachnida	Opiliones	Laniatores	Zalmoxoidea	Icaleptidae		Icaleptes	malkini		Kury & Pérez, 2002	Icaleptes malkini Kury & Pérez, 2002	species	Neotropical	valid	Kury, Adriano B.
OPIL SP 0232	Checklist	Dataset	Animalia	Arthropoda	Arachnida	Opiliones	Laniatores	Zalmoxoidea	Icaleptidae		Zalmopsylla	platnicki		Kury & Pérez, 2002	Zalmopsylla platnicki Kury & Pérez, 2002	species	Neotropical	valid	Kury, Adriano B.
OPIL SP 0233	Checklist	Dataset	Animalia	Arthropoda	Arachnida	Opiliones	Laniatores	Zalmoxoidea	Kimulidae		Acanthominua	tricarinata		Sørensen, 1932	Acanthominua tricarinata Sørensen, 1932	species	Neotropical	valid	Kury, Adriano B.
OPIL SP 0234	Checklist	Dataset	Animalia	Arthropoda	Arachnida	Opiliones	Laniatores	Zalmoxoidea	Kimulidae		Euminua	brevitarsa		Sørensen, 1932	Euminua brevitarsa Sørensen, 1932	species	Neotropical	valid	Kury, Adriano B.
OPIL SP 0235	Checklist	Dataset	Animalia	Arthropoda	Arachnida	Opiliones	Laniatores	Zalmoxoidea	Kimulidae		Euminuoides	longitarsa		(Sørensen, 1932)	Euminuoides longitarsa (Sørensen, 1932)	species	Neotropical	valid	Kury, Adriano B.
OPIL SP 0236	Checklist	Dataset	Animalia	Arthropoda	Arachnida	Opiliones	Laniatores	Zalmoxoidea	Kimulidae		Fudeci	curvifemur		González-Sponga, 1998	Fudeci curvifemur González-Sponga, 1998	species	Neotropical	valid	Kury, Adriano B.
OPIL SP 0237	Checklist	Dataset	Animalia	Arthropoda	Arachnida	Opiliones	Laniatores	Zalmoxoidea	Kimulidae		Kimula	banksi		Šilhavý, 1969	Kimula banksi Šilhavý, 1969	species	Neotropical	valid	Kury, Adriano B.
OPIL SP 0238	Checklist	Dataset	Animalia	Arthropoda	Arachnida	Opiliones	Laniatores	Zalmoxoidea	Kimulidae		Kimula	cokendolpheri		Pérez & Armas, 2000	Kimula cokendolpheri Pérez & Armas, 2000	species	Neotropical	valid	Kury, Adriano B.
OPIL SP 0239	Checklist	Dataset	Animalia	Arthropoda	Arachnida	Opiliones	Laniatores	Zalmoxoidea	Kimulidae		Kimula	elongata		Goodnight & Goodnight, 1942	Kimula elongata Goodnight & Goodnight, 1942	species	Neotropical	valid	Kury, Adriano B.
OPIL SP 0240	Checklist	Dataset	Animalia	Arthropoda	Arachnida	Opiliones	Laniatores	Zalmoxoidea	Kimulidae		Kimula	goodnightiorum		Šilhavý, 1969	Kimula goodnightiorum Šilhavý, 1969	species	Neotropical	valid	Kury, Adriano B.
OPIL SP 0241	Checklist	Dataset	Animalia	Arthropoda	Arachnida	Opiliones	Laniatores	Zalmoxoidea	Kimulidae		Kimula	levii		Šilhavý, 1969	Kimula levii Šilhavý, 1969	species	Neotropical	valid	Kury, Adriano B.
OPIL SP 0242	Checklist	Dataset	Animalia	Arthropoda	Arachnida	Opiliones	Laniatores	Zalmoxoidea	Kimulidae		Kimula	tuberculata		Goodnight & Goodnight, 1943	Kimula tuberculata Goodnight & Goodnight, 1943	species	Neotropical	valid	Kury, Adriano B.
OPIL SP 0243	Checklist	Dataset	Animalia	Arthropoda	Arachnida	Opiliones	Laniatores	Zalmoxoidea	Kimulidae		Kimula	turquinensis		Šilhavý, 1969	Kimula turquinensis Šilhavý, 1969	species	Neotropical	valid	Kury, Adriano B.
OPIL SP 0244	Checklist	Dataset	Animalia	Arthropoda	Arachnida	Opiliones	Laniatores	Zalmoxoidea	Kimulidae		Metakimula	botosaneanui		(Avram, 1973)	Metakimula botosaneanui (Avram, 1973)	species	Neotropical	valid	Kury, Adriano B.
OPIL SP 0245	Checklist	Dataset	Animalia	Arthropoda	Arachnida	Opiliones	Laniatores	Zalmoxoidea	Kimulidae		Minuella	barloventensis		González-Sponga, 1987	Minuella barloventensis González-Sponga, 1987	species	Neotropical	valid	Kury, Adriano B.
OPIL SP 0246	Checklist	Dataset	Animalia	Arthropoda	Arachnida	Opiliones	Laniatores	Zalmoxoidea	Kimulidae		Minuella	choroniensis		González-Sponga, 1987	Minuella choroniensis González-Sponga, 1987	species	Neotropical	valid	Kury, Adriano B.
OPIL SP 0247	Checklist	Dataset	Animalia	Arthropoda	Arachnida	Opiliones	Laniatores	Zalmoxoidea	Kimulidae		Minuella	crassa		González-Sponga, 1987	Minuella crassa González-Sponga, 1987	species	Neotropical	valid	Kury, Adriano B.
OPIL SP 0248	Checklist	Dataset	Animalia	Arthropoda	Arachnida	Opiliones	Laniatores	Zalmoxoidea	Kimulidae		Minuella	denticulata		González-Sponga, 1987	Minuella denticulata González-Sponga, 1987	species	Neotropical	valid	Kury, Adriano B.
OPIL SP 0249	Checklist	Dataset	Animalia	Arthropoda	Arachnida	Opiliones	Laniatores	Zalmoxoidea	Kimulidae		Minuella	dimorpha		(Sørensen, 1932)	Minuella dimorpha (Sørensen, 1932)	species	Neotropical	valid	Kury, Adriano B.
OPIL SP 0250	Checklist	Dataset	Animalia	Arthropoda	Arachnida	Opiliones	Laniatores	Zalmoxoidea	Kimulidae		Minuella	elias		(Sørensen, 1932)	Minuella elias (Sørensen, 1932)	species	Neotropical	valid	Kury, Adriano B.
OPIL SP 0251	Checklist	Dataset	Animalia	Arthropoda	Arachnida	Opiliones	Laniatores	Zalmoxoidea	Kimulidae		Minuella	guatopensis		González-Sponga, 1987	Minuella guatopensis González-Sponga, 1987	species	Neotropical	valid	Kury, Adriano B.
OPIL SP 0252	Checklist	Dataset	Animalia	Arthropoda	Arachnida	Opiliones	Laniatores	Zalmoxoidea	Kimulidae		Minuella	momoyana		González-Sponga, 1998	Minuella momoyana González-Sponga, 1998	species	Neotropical	valid	Kury, Adriano B.
OPIL SP 0253	Checklist	Dataset	Animalia	Arthropoda	Arachnida	Opiliones	Laniatores	Zalmoxoidea	Kimulidae		Minuella	montis		González-Sponga, 1987	Minuella montis González-Sponga, 1987	species	Neotropical	valid	Kury, Adriano B.
OPIL SP 0254	Checklist	Dataset	Animalia	Arthropoda	Arachnida	Opiliones	Laniatores	Zalmoxoidea	Kimulidae		Minuella	nebulae		González-Sponga, 1987	Minuella nebulae González-Sponga, 1987	species	Neotropical	valid	Kury, Adriano B.
OPIL SP 0255	Checklist	Dataset	Animalia	Arthropoda	Arachnida	Opiliones	Laniatores	Zalmoxoidea	Kimulidae		Minuella	parva		González-Sponga, 1987	Minuella parva González-Sponga, 1987	species	Neotropical	valid	Kury, Adriano B.
OPIL SP 0256	Checklist	Dataset	Animalia	Arthropoda	Arachnida	Opiliones	Laniatores	Zalmoxoidea	Kimulidae		Minuella	pinturelensis		González-Sponga, 1987	Minuella pinturelensis González-Sponga, 1987	species	Neotropical	valid	Kury, Adriano B.
OPIL SP 0257	Checklist	Dataset	Animalia	Arthropoda	Arachnida	Opiliones	Laniatores	Zalmoxoidea	Kimulidae		Minuella	punctiacuta		González-Sponga, 1987	Minuella punctiacuta González-Sponga, 1987	species	Neotropical	valid	Kury, Adriano B.
OPIL SP 0258	Checklist	Dataset	Animalia	Arthropoda	Arachnida	Opiliones	Laniatores	Zalmoxoidea	Kimulidae		Minuella	scabra		(Sørensen, 1932)	Minuella scabra (Sørensen, 1932)	species	Neotropical	valid	Kury, Adriano B.
OPIL SP 0259	Checklist	Dataset	Animalia	Arthropoda	Arachnida	Opiliones	Laniatores	Zalmoxoidea	Kimulidae		Minuella	venefica		González-Sponga, 1987	Minuella venefica González-Sponga, 1987	species	Neotropical	valid	Kury, Adriano B.
OPIL SP 0260	Checklist	Dataset	Animalia	Arthropoda	Arachnida	Opiliones	Laniatores	Zalmoxoidea	Kimulidae		Pseudominua	convolvulus		(Sørensen, 1932)	Pseudominua convolvulus (Sørensen, 1932)	species	Neotropical	valid	Kury, Adriano B.
OPIL SP 0261	Checklist	Dataset	Animalia	Arthropoda	Arachnida	Opiliones	Laniatores	Zalmoxoidea	Kimulidae		Pseudominua	peruviana		Roewer, 1963	Pseudominua peruviana Roewer, 1963	species	Neotropical	valid	Kury, Adriano B.
OPIL SP 0262	Checklist	Dataset	Animalia	Arthropoda	Arachnida	Opiliones	Laniatores	Zalmoxoidea	Kimulidae		Tegipiolus	pachypus		Roewer, 1949	Tegipiolus pachypus Roewer, 1949	species	Neotropical	valid	Kury, Adriano B.
OPIL SP 0263	Checklist	Dataset	Animalia	Arthropoda	Arachnida	Opiliones	Laniatores	Zalmoxoidea	Zalmoxidae		Absonus	ayalai		González-Sponga, 1987	Absonus ayalai González-Sponga, 1987	species	Neotropical	valid	Kury, Adriano B.
OPIL SP 0264	Checklist	Dataset	Animalia	Arthropoda	Arachnida	Opiliones	Laniatores	Zalmoxoidea	Zalmoxidae		Absonus	caracasensis		González-Sponga, 1987	Absonus caracasensis González-Sponga, 1987	species	Neotropical	valid	Kury, Adriano B.
OPIL SP 0265	Checklist	Dataset	Animalia	Arthropoda	Arachnida	Opiliones	Laniatores	Zalmoxoidea	Zalmoxidae		Araguita	speciosa		González-Sponga, 1987	Araguita speciosa González-Sponga, 1987	species	Neotropical	valid	Kury, Adriano B.
OPIL SP 0266	Checklist	Dataset	Animalia	Arthropoda	Arachnida	Opiliones	Laniatores	Zalmoxoidea	Zalmoxidae		Avilaia	cordillerensis		González-Sponga, 1998	Avilaia cordillerensis González-Sponga, 1998	species	Neotropical	valid	Kury, Adriano B.
OPIL SP 0267	Checklist	Dataset	Animalia	Arthropoda	Arachnida	Opiliones	Laniatores	Zalmoxoidea	Zalmoxidae		Azulitaia	rubicunda		González-Sponga, 1987	Azulitaia rubicunda González-Sponga, 1987	species	Neotropical	valid	Kury, Adriano B.
OPIL SP 0268	Checklist	Dataset	Animalia	Arthropoda	Arachnida	Opiliones	Laniatores	Zalmoxoidea	Zalmoxidae		Buruquelia	cornifera		González-Sponga, 1999	Buruquelia cornifera González-Sponga, 1999	species	Neotropical	valid	Kury, Adriano B.
OPIL SP 0269	Checklist	Dataset	Animalia	Arthropoda	Arachnida	Opiliones	Laniatores	Zalmoxoidea	Zalmoxidae		Carayaca	ornata		González-Sponga, 1998	Carayaca ornata González-Sponga, 1998	species	Neotropical	valid	Kury, Adriano B.
OPIL SP 0270	Checklist	Dataset	Animalia	Arthropoda	Arachnida	Opiliones	Laniatores	Zalmoxoidea	Zalmoxidae		Cersa	kratochvili		Šilhavý, 1979	Cersa kratochvili Šilhavý, 1979	species	Neotropical	valid	Kury, Adriano B.
OPIL SP 0271	Checklist	Dataset	Animalia	Arthropoda	Arachnida	Opiliones	Laniatores	Zalmoxoidea	Zalmoxidae		Chamaia	convexa		González-Sponga, 1987	Chamaia convexa González-Sponga, 1987	species	Neotropical	valid	Kury, Adriano B.
OPIL SP 0272	Checklist	Dataset	Animalia	Arthropoda	Arachnida	Opiliones	Laniatores	Zalmoxoidea	Zalmoxidae		Chirimena	brevigranulata		González-Sponga, 1999	Chirimena brevigranulata González-Sponga, 1999	species	Neotropical	valid	Kury, Adriano B.
OPIL SP 0273	Checklist	Dataset	Animalia	Arthropoda	Arachnida	Opiliones	Laniatores	Zalmoxoidea	Zalmoxidae		Cubiria	inflata		González-Sponga, 1999	Cubiria inflata González-Sponga, 1999	species	Neotropical	valid	Kury, Adriano B.
OPIL SP 0274	Checklist	Dataset	Animalia	Arthropoda	Arachnida	Opiliones	Laniatores	Zalmoxoidea	Zalmoxidae		Cubiria	peculiaris		González-Sponga, 1987	Cubiria peculiaris González-Sponga, 1987	species	Neotropical	valid	Kury, Adriano B.
OPIL SP 0275	Checklist	Dataset	Animalia	Arthropoda	Arachnida	Opiliones	Laniatores	Zalmoxoidea	Zalmoxidae		Curimaguanus	infrequentis		(González-Sponga, 1987)	Curimaguanus infrequentis (González-Sponga, 1987)	species	Neotropical	valid	Kury, Adriano B.
OPIL SP 0276	Checklist	Dataset	Animalia	Arthropoda	Arachnida	Opiliones	Laniatores	Zalmoxoidea	Zalmoxidae		Ethobunus	acanthotibialis		(Goodnight & Goodnight, 1953)	Ethobunus acanthotibialis (Goodnight & Goodnight, 1953)	species	Neotropical	valid	Kury, Adriano B.
OPIL SP 0277	Checklist	Dataset	Animalia	Arthropoda	Arachnida	Opiliones	Laniatores	Zalmoxoidea	Zalmoxidae		Ethobunus	albitrochanteris		(Roewer, 1933)	Ethobunus albitrochanteris (Roewer, 1933)	species	Neotropical	valid	Kury, Adriano B.
OPIL SP 0278	Checklist	Dataset	Animalia	Arthropoda	Arachnida	Opiliones	Laniatores	Zalmoxoidea	Zalmoxidae		Ethobunus	armatus		(Roewer, 1954)	Ethobunus armatus (Roewer, 1954)	species	Neotropical	valid	Kury, Adriano B.
OPIL SP 0279	Checklist	Dataset	Animalia	Arthropoda	Arachnida	Opiliones	Laniatores	Zalmoxoidea	Zalmoxidae		Ethobunus	atroluteus		(Roewer, 1949)	Ethobunus atroluteus (Roewer, 1949)	species	Neotropical	valid	Kury, Adriano B.
OPIL SP 0280	Checklist	Dataset	Animalia	Arthropoda	Arachnida	Opiliones	Laniatores	Zalmoxoidea	Zalmoxidae		Ethobunus	brasiliensis		(Mello-Leitão, 1941)	Ethobunus brasiliensis (Mello-Leitão, 1941)	species	Neotropical	valid	Kury, Adriano B.
OPIL SP 0281	Checklist	Dataset	Animalia	Arthropoda	Arachnida	Opiliones	Laniatores	Zalmoxoidea	Zalmoxidae		Ethobunus	brevis		(Roewer, 1949)	Ethobunus brevis (Roewer, 1949)	species	Neotropical	valid	Kury, Adriano B.
OPIL SP 0282	Checklist	Dataset	Animalia	Arthropoda	Arachnida	Opiliones	Laniatores	Zalmoxoidea	Zalmoxidae		Ethobunus	calvus		(González-Sponga, 1998)	Ethobunus calvus (González-Sponga, 1998)	species	Neotropical	valid	Kury, Adriano B.
OPIL SP 0283	Checklist	Dataset	Animalia	Arthropoda	Arachnida	Opiliones	Laniatores	Zalmoxoidea	Zalmoxidae		Ethobunus	ceriseus		(Sørensen, 1932)	Ethobunus ceriseus (Sørensen, 1932)	species	Neotropical	valid	Kury, Adriano B.
OPIL SP 0284	Checklist	Dataset	Animalia	Arthropoda	Arachnida	Opiliones	Laniatores	Zalmoxoidea	Zalmoxidae		Ethobunus	cubensis		(Šilhavý, 1979)	Ethobunus cubensis (Šilhavý, 1979)	species	Neotropical	valid	Kury, Adriano B.
OPIL SP 0285	Checklist	Dataset	Animalia	Arthropoda	Arachnida	Opiliones	Laniatores	Zalmoxoidea	Zalmoxidae		Ethobunus	filipes		(Roewer, 1949)	Ethobunus filipes (Roewer, 1949)	species	Neotropical	valid	Kury, Adriano B.
OPIL SP 0286	Checklist	Dataset	Animalia	Arthropoda	Arachnida	Opiliones	Laniatores	Zalmoxoidea	Zalmoxidae		Ethobunus	foliatus		(Goodnight & Goodnight, 1983)	Ethobunus foliatus (Goodnight & Goodnight, 1983)	species	Neotropical	valid	Kury, Adriano B.
OPIL SP 0287	Checklist	Dataset	Animalia	Arthropoda	Arachnida	Opiliones	Laniatores	Zalmoxoidea	Zalmoxidae		Ethobunus	gertschi		(Goodnight & Goodnight, 1942)	Ethobunus gertschi (Goodnight & Goodnight, 1942)	species	Neotropical	valid	Kury, Adriano B.
OPIL SP 0288	Checklist	Dataset	Animalia	Arthropoda	Arachnida	Opiliones	Laniatores	Zalmoxoidea	Zalmoxidae		Ethobunus	goodnighti		(Rambla, 1969)	Ethobunus goodnighti (Rambla, 1969)	species	Neotropical	valid	Kury, Adriano B.
OPIL SP 0289	Checklist	Dataset	Animalia	Arthropoda	Arachnida	Opiliones	Laniatores	Zalmoxoidea	Zalmoxidae		Ethobunus	gracililongipes		(González-Sponga, 1987)	Ethobunus gracililongipes (González-Sponga, 1987)	species	Neotropical	valid	Kury, Adriano B.
OPIL SP 0290	Checklist	Dataset	Animalia	Arthropoda	Arachnida	Opiliones	Laniatores	Zalmoxoidea	Zalmoxidae		Ethobunus	gracilipes		(Roewer, 1949)	Ethobunus gracilipes (Roewer, 1949)	species	Neotropical	valid	Kury, Adriano B.
OPIL SP 0291	Checklist	Dataset	Animalia	Arthropoda	Arachnida	Opiliones	Laniatores	Zalmoxoidea	Zalmoxidae		Ethobunus	llorensis		(Goodnight & Goodnight, 1983)	Ethobunus llorensis (Goodnight & Goodnight, 1983)	species	Neotropical	valid	Kury, Adriano B.
OPIL SP 0292	Checklist	Dataset	Animalia	Arthropoda	Arachnida	Opiliones	Laniatores	Zalmoxoidea	Zalmoxidae		Ethobunus	longus		(Goodnight & Goodnight, 1942)	Ethobunus longus (Goodnight & Goodnight, 1942)	species	Neotropical	valid	Kury, Adriano B.
OPIL SP 0293	Checklist	Dataset	Animalia	Arthropoda	Arachnida	Opiliones	Laniatores	Zalmoxoidea	Zalmoxidae		Ethobunus	meridionalis		(Caporiacco, 1951)	Ethobunus meridionalis (Caporiacco, 1951)	species	Neotropical	valid	Kury, Adriano B.
OPIL SP 0294	Checklist	Dataset	Animalia	Arthropoda	Arachnida	Opiliones	Laniatores	Zalmoxoidea	Zalmoxidae		Ethobunus	minutus		(Goodnight & Goodnight, 1977)	Ethobunus minutus (Goodnight & Goodnight, 1977)	species	Neotropical	valid	Kury, Adriano B.
OPIL SP 0295	Checklist	Dataset	Animalia	Arthropoda	Arachnida	Opiliones	Laniatores	Zalmoxoidea	Zalmoxidae		Ethobunus	misticus		(Goodnight & Goodnight, 1977)	Ethobunus misticus (Goodnight & Goodnight, 1977)	species	Neotropical	valid	Kury, Adriano B.
OPIL SP 0296	Checklist	Dataset	Animalia	Arthropoda	Arachnida	Opiliones	Laniatores	Zalmoxoidea	Zalmoxidae		Ethobunus	parallelus		(Goodnight & Goodnight, 1942)	Ethobunus parallelus (Goodnight & Goodnight, 1942)	species	Neotropical	valid	Kury, Adriano B.
OPIL SP 0297	Checklist	Dataset	Animalia	Arthropoda	Arachnida	Opiliones	Laniatores	Zalmoxoidea	Zalmoxidae		Ethobunus	pecki		(Rambla, 1969)	Ethobunus pecki (Rambla, 1969)	species	Neotropical	valid	Kury, Adriano B.
OPIL SP 0298	Checklist	Dataset	Animalia	Arthropoda	Arachnida	Opiliones	Laniatores	Zalmoxoidea	Zalmoxidae		Ethobunus	pilosus		(Goodnight & Goodnight, 1953)	Ethobunus pilosus (Goodnight & Goodnight, 1953)	species	Neotropical	valid	Kury, Adriano B.
OPIL SP 0299	Checklist	Dataset	Animalia	Arthropoda	Arachnida	Opiliones	Laniatores	Zalmoxoidea	Zalmoxidae		Ethobunus	rectipes		(Roewer, 1928)	Ethobunus rectipes (Roewer, 1928)	species	Neotropical	valid	Kury, Adriano B.
OPIL SP 0300	Checklist	Dataset	Animalia	Arthropoda	Arachnida	Opiliones	Laniatores	Zalmoxoidea	Zalmoxidae		Ethobunus	simplex		Chamberlin, 1925	Ethobunus simplex Chamberlin, 1925	species	Neotropical	valid	Kury, Adriano B.
OPIL SP 0301	Checklist	Dataset	Animalia	Arthropoda	Arachnida	Opiliones	Laniatores	Zalmoxoidea	Zalmoxidae		Ethobunus	tarsalis		(Banks, 1909)	Ethobunus tarsalis (Banks, 1909)	species	Neotropical	valid	Kury, Adriano B.
OPIL SP 0302	Checklist	Dataset	Animalia	Arthropoda	Arachnida	Opiliones	Laniatores	Zalmoxoidea	Zalmoxidae		Ethobunus	tenuis		(Roewer, 1949)	Ethobunus tenuis (Roewer, 1949)	species	Neotropical	valid	Kury, Adriano B.
OPIL SP 0303	Checklist	Dataset	Animalia	Arthropoda	Arachnida	Opiliones	Laniatores	Zalmoxoidea	Zalmoxidae		Ethobunus	trochantericus		(Roewer, 1949)	Ethobunus trochantericus (Roewer, 1949)	species	Neotropical	valid	Kury, Adriano B.
OPIL SP 0304	Checklist	Dataset	Animalia	Arthropoda	Arachnida	Opiliones	Laniatores	Zalmoxoidea	Zalmoxidae		Ethobunus	tuberculatus		(Goodnight & Goodnight, 1947)	Ethobunus tuberculatus (Goodnight & Goodnight, 1947)	species	Neotropical	valid	Kury, Adriano B.
OPIL SP 0305	Checklist	Dataset	Animalia	Arthropoda	Arachnida	Opiliones	Laniatores	Zalmoxoidea	Zalmoxidae		Ethobunus	vitensis		(Goodnight & Goodnight, 1983)	Ethobunus vitensis (Goodnight & Goodnight, 1983)	species	Neotropical	valid	Kury, Adriano B.
OPIL SP 0306	Checklist	Dataset	Animalia	Arthropoda	Arachnida	Opiliones	Laniatores	Zalmoxoidea	Zalmoxidae		Ethobunus	xiomarae		(González-Sponga, 1998)	Ethobunus xiomarae (González-Sponga, 1998)	species	Neotropical	valid	Kury, Adriano B.
OPIL SP 0307	Checklist	Dataset	Animalia	Arthropoda	Arachnida	Opiliones	Laniatores	Zalmoxoidea	Zalmoxidae		Ethobunus	zalmoxiformis		(Roewer, 1949)	Ethobunus zalmoxiformis (Roewer, 1949)	species	Neotropical	valid	Kury, Adriano B.
OPIL SP 0308	Checklist	Dataset	Animalia	Arthropoda	Arachnida	Opiliones	Laniatores	Zalmoxoidea	Zalmoxidae		Ethobunus	zebroides		(Šilhavý, 1979)	Ethobunus zebroides (Šilhavý, 1979)	species	Neotropical	valid	Kury, Adriano B.
OPIL SP 0309	Checklist	Dataset	Animalia	Arthropoda	Arachnida	Opiliones	Laniatores	Zalmoxoidea	Zalmoxidae		Galanomma	microphthalmum		Juberthie, 1970	Galanomma microphthalmum Juberthie, 1970	species	Neotropical	valid	Kury, Adriano B.
OPIL SP 0310	Checklist	Dataset	Animalia	Arthropoda	Arachnida	Opiliones	Laniatores	Zalmoxoidea	Zalmoxidae		Garanhunsa	pectanalis		Roewer, 1949	Garanhunsa pectanalis Roewer, 1949	species	Neotropical	valid	Kury, Adriano B.
OPIL SP 0311	Checklist	Dataset	Animalia	Arthropoda	Arachnida	Opiliones	Laniatores	Zalmoxoidea	Zalmoxidae		Granulaia	stygnoides		González-Sponga, 1997	Granulaia stygnoides González-Sponga, 1997	species	Neotropical	valid	Kury, Adriano B.
OPIL SP 0312	Checklist	Dataset	Animalia	Arthropoda	Arachnida	Opiliones	Laniatores	Zalmoxoidea	Zalmoxidae		Guagonia	multispina		González-Sponga, 1987	Guagonia multispina González-Sponga, 1987	species	Neotropical	valid	Kury, Adriano B.
OPIL SP 0313	Checklist	Dataset	Animalia	Arthropoda	Arachnida	Opiliones	Laniatores	Zalmoxoidea	Zalmoxidae		Guayania	inflata		González-Sponga, 1999	Guayania inflata González-Sponga, 1999	species	Neotropical	valid	Kury, Adriano B.
OPIL SP 0314	Checklist	Dataset	Animalia	Arthropoda	Arachnida	Opiliones	Laniatores	Zalmoxoidea	Zalmoxidae		Haitonia	alba		González-Sponga, 1987	Haitonia alba González-Sponga, 1987	species	Neotropical	valid	Kury, Adriano B.
OPIL SP 0315	Checklist	Dataset	Animalia	Arthropoda	Arachnida	Opiliones	Laniatores	Zalmoxoidea	Zalmoxidae		Heteroscotolemon	australis		Roewer, 1912	Heteroscotolemon australis Roewer, 1912	species	Neotropical	valid	Kury, Adriano B.
OPIL SP 0316	Checklist	Dataset	Animalia	Arthropoda	Arachnida	Opiliones	Laniatores	Zalmoxoidea	Zalmoxidae		Jajinia	bromeliaca		González-Sponga, 1987	Jajinia bromeliaca González-Sponga, 1987	species	Neotropical	valid	Kury, Adriano B.
OPIL SP 0317	Checklist	Dataset	Animalia	Arthropoda	Arachnida	Opiliones	Laniatores	Zalmoxoidea	Zalmoxidae		Jajinia	jajinia		González-Sponga, 1998	Jajinia jajinia González-Sponga, 1998	species	Neotropical	valid	Kury, Adriano B.
OPIL SP 0318	Checklist	Dataset	Animalia	Arthropoda	Arachnida	Opiliones	Laniatores	Zalmoxoidea	Zalmoxidae		Junquito	denticuloso		González-Sponga, 1999	Junquito denticuloso González-Sponga, 1999	species	Neotropical	valid	Kury, Adriano B.
OPIL SP 0319	Checklist	Dataset	Animalia	Arthropoda	Arachnida	Opiliones	Laniatores	Zalmoxoidea	Zalmoxidae		Micro	obtusangulus		González-Sponga, 1987	Micro obtusangulus González-Sponga, 1987	species	Neotropical	valid	Kury, Adriano B.
OPIL SP 0320	Checklist	Dataset	Animalia	Arthropoda	Arachnida	Opiliones	Laniatores	Zalmoxoidea	Zalmoxidae		Minuides	americanus		(Roewer, 1952)	Minuides americanus (Roewer, 1952)	species		valid	Kury, Adriano B.
OPIL SP 0321	Checklist	Dataset	Animalia	Arthropoda	Arachnida	Opiliones	Laniatores	Zalmoxoidea	Zalmoxidae		Minuides	koepckei		Roewer, 1956	Minuides koepckei Roewer, 1956	species	Neotropical	valid	Kury, Adriano B.
OPIL SP 0322	Checklist	Dataset	Animalia	Arthropoda	Arachnida	Opiliones	Laniatores	Zalmoxoidea	Zalmoxidae		Minuides	milleri		Šilhavý, 1978	Minuides milleri Šilhavý, 1978	species	Neotropical	valid	Kury, Adriano B.
OPIL SP 0323	Checklist	Dataset	Animalia	Arthropoda	Arachnida	Opiliones	Laniatores	Zalmoxoidea	Zalmoxidae		Minuides	oedipus		Roewer, 1963	Minuides oedipus Roewer, 1963	species	Neotropical	valid	Kury, Adriano B.
OPIL SP 0324	Checklist	Dataset	Animalia	Arthropoda	Arachnida	Opiliones	Laniatores	Zalmoxoidea	Zalmoxidae		Minuides	rudicoxa		Roewer, 1949	Minuides rudicoxa Roewer, 1949	species	Neotropical	valid	Kury, Adriano B.
OPIL SP 0325	Checklist	Dataset	Animalia	Arthropoda	Arachnida	Opiliones	Laniatores	Zalmoxoidea	Zalmoxidae		Minuides	setosa		Sørensen, 1932	Minuides setosa Sørensen, 1932	species	Neotropical	valid	Kury, Adriano B.
OPIL SP 0326	Checklist	Dataset	Animalia	Arthropoda	Arachnida	Opiliones	Laniatores	Zalmoxoidea	Zalmoxidae		Mitraia	unispina		(González-Sponga, 1987)	Mitraia unispina (González-Sponga, 1987)	species	Neotropical	valid	Kury, Adriano B.
OPIL SP 0327	Checklist	Dataset	Animalia	Arthropoda	Arachnida	Opiliones	Laniatores	Zalmoxoidea	Zalmoxidae		Neobabrius	parvulus		Roewer, 1949	Neobabrius parvulus Roewer, 1949	species	Indomalayan	valid	Kury, Adriano B.
OPIL SP 0328	Checklist	Dataset	Animalia	Arthropoda	Arachnida	Opiliones	Laniatores	Zalmoxoidea	Zalmoxidae		Neocea	lanceolata		(González-Sponga, 1987)	Neocea lanceolata (González-Sponga, 1987)	species	Neotropical	valid	Kury, Adriano B.
OPIL SP 0329	Checklist	Dataset	Animalia	Arthropoda	Arachnida	Opiliones	Laniatores	Zalmoxoidea	Zalmoxidae		Oo	spinosum		(González-Sponga, 1999)	Oo spinosum (González-Sponga, 1999)	species	Neotropical	valid	Kury, Adriano B.
OPIL SP 0330	Checklist	Dataset	Animalia	Arthropoda	Arachnida	Opiliones	Laniatores	Zalmoxoidea	Zalmoxidae		Opilioparamo	meridensis		(González-Sponga, 1987)	Opilioparamo meridensis (González-Sponga, 1987)	species	Neotropical	valid	Kury, Adriano B.
OPIL SP 0331	Checklist	Dataset	Animalia	Arthropoda	Arachnida	Opiliones	Laniatores	Zalmoxoidea	Zalmoxidae		Opilioparamo	regaladoi		(González-Sponga, 1999)	Opilioparamo regaladoi (González-Sponga, 1999)	species	Neotropical	valid	Kury, Adriano B.
OPIL SP 0332	Checklist	Dataset	Animalia	Arthropoda	Arachnida	Opiliones	Laniatores	Zalmoxoidea	Zalmoxidae		Orituco	gracilipalpi		González-Sponga, 1987	Orituco gracilipalpi González-Sponga, 1987	species	Neotropical	valid	Kury, Adriano B.
OPIL SP 0333	Checklist	Dataset	Animalia	Arthropoda	Arachnida	Opiliones	Laniatores	Zalmoxoidea	Zalmoxidae		Orituco	pariensis		González-Sponga, 1991	Orituco pariensis González-Sponga, 1991	species	Neotropical	valid	Kury, Adriano B.
OPIL SP 0334	Checklist	Dataset	Animalia	Arthropoda	Arachnida	Opiliones	Laniatores	Zalmoxoidea	Zalmoxidae		Orituco	tuberculosa		González-Sponga, 1987	Orituco tuberculosa González-Sponga, 1987	species	Neotropical	valid	Kury, Adriano B.
OPIL SP 0335	Checklist	Dataset	Animalia	Arthropoda	Arachnida	Opiliones	Laniatores	Zalmoxoidea	Zalmoxidae		Orituco	tuyensis		González-Sponga, 1987	Orituco tuyensis González-Sponga, 1987	species	Neotropical	valid	Kury, Adriano B.
OPIL SP 0336	Checklist	Dataset	Animalia	Arthropoda	Arachnida	Opiliones	Laniatores	Zalmoxoidea	Zalmoxidae		Pachylicus	acutus		(Goodnight & Goodnight, 1942)	Pachylicus acutus (Goodnight & Goodnight, 1942)	species	Neotropical	valid	Kury, Adriano B.
OPIL SP 0337	Checklist	Dataset	Animalia	Arthropoda	Arachnida	Opiliones	Laniatores	Zalmoxoidea	Zalmoxidae		Pachylicus	castaneus		(Šilhavý, 1979)	Pachylicus castaneus (Šilhavý, 1979)	species	Neotropical	valid	Kury, Adriano B.
OPIL SP 0338	Checklist	Dataset	Animalia	Arthropoda	Arachnida	Opiliones	Laniatores	Zalmoxoidea	Zalmoxidae		Pachylicus	cotoensis		Goodnight & Goodnight, 1983	Pachylicus cotoensis Goodnight & Goodnight, 1983	species	Neotropical	valid	Kury, Adriano B.
OPIL SP 0339	Checklist	Dataset	Animalia	Arthropoda	Arachnida	Opiliones	Laniatores	Zalmoxoidea	Zalmoxidae		Pachylicus	foveolatus		Goodnight & Goodnight, 1983	Pachylicus foveolatus Goodnight & Goodnight, 1983	species	Neotropical	valid	Kury, Adriano B.
OPIL SP 0340	Checklist	Dataset	Animalia	Arthropoda	Arachnida	Opiliones	Laniatores	Zalmoxoidea	Zalmoxidae		Pachylicus	hirsutus		(Roewer, 1949)	Pachylicus hirsutus (Roewer, 1949)	species	Neotropical	valid	Kury, Adriano B.
OPIL SP 0341	Checklist	Dataset	Animalia	Arthropoda	Arachnida	Opiliones	Laniatores	Zalmoxoidea	Zalmoxidae		Pachylicus	hispidus		Goodnight & Goodnight, 1983	Pachylicus hispidus Goodnight & Goodnight, 1983	species	Neotropical	valid	Kury, Adriano B.
OPIL SP 0342	Checklist	Dataset	Animalia	Arthropoda	Arachnida	Opiliones	Laniatores	Zalmoxoidea	Zalmoxidae		Pachylicus	petrunkevitchi		(Mello-Leitão, 1944)	Pachylicus petrunkevitchi (Mello-Leitão, 1944)	species	Neotropical	valid	Kury, Adriano B.
OPIL SP 0343	Checklist	Dataset	Animalia	Arthropoda	Arachnida	Opiliones	Laniatores	Zalmoxoidea	Zalmoxidae		Pachylicus	rugosus		(Banks, 1909)	Pachylicus rugosus (Banks, 1909)	species	Neotropical	valid	Kury, Adriano B.
OPIL SP 0344	Checklist	Dataset	Animalia	Arthropoda	Arachnida	Opiliones	Laniatores	Zalmoxoidea	Zalmoxidae		Pachylicus	spinatus		Goodnight & Goodnight, 1983	Pachylicus spinatus Goodnight & Goodnight, 1983	species	Neotropical	valid	Kury, Adriano B.
OPIL SP 0345	Checklist	Dataset	Animalia	Arthropoda	Arachnida	Opiliones	Laniatores	Zalmoxoidea	Zalmoxidae		Panaquire	calva		González-Sponga, 1987	Panaquire calva González-Sponga, 1987	species	Neotropical	valid	Kury, Adriano B.
OPIL SP 0346	Checklist	Dataset	Animalia	Arthropoda	Arachnida	Opiliones	Laniatores	Zalmoxoidea	Zalmoxidae		Panopiliops	inops		Goodnight & Goodnight, 1983	Panopiliops inops Goodnight & Goodnight, 1983	species	Neotropical	valid	Kury, Adriano B.
OPIL SP 0347	Checklist	Dataset	Animalia	Arthropoda	Arachnida	Opiliones	Laniatores	Zalmoxoidea	Zalmoxidae		Panopiliops	reimoseri		(Roewer, 1949)	Panopiliops reimoseri (Roewer, 1949)	species	Neotropical	valid	Kury, Adriano B.
OPIL SP 0348	Checklist	Dataset	Animalia	Arthropoda	Arachnida	Opiliones	Laniatores	Zalmoxoidea	Zalmoxidae		Paraminuella	bristowei		Caporiacco, 1951	Paraminuella bristowei Caporiacco, 1951	species	Neotropical	valid	Kury, Adriano B.
OPIL SP 0349	Checklist	Dataset	Animalia	Arthropoda	Arachnida	Opiliones	Laniatores	Zalmoxoidea	Zalmoxidae		Parascotolemon	bipunctus		(González-Sponga, 1987)	Parascotolemon bipunctus (González-Sponga, 1987)	species	Neotropical	valid	Kury, Adriano B.
OPIL SP 0350	Checklist	Dataset	Animalia	Arthropoda	Arachnida	Opiliones	Laniatores	Zalmoxoidea	Zalmoxidae		Parascotolemon	hirsutus		(Goodnight & Goodnight, 1942)	Parascotolemon hirsutus (Goodnight & Goodnight, 1942)	species	Neotropical	valid	Kury, Adriano B.
OPIL SP 0351	Checklist	Dataset	Animalia	Arthropoda	Arachnida	Opiliones	Laniatores	Zalmoxoidea	Zalmoxidae		Parascotolemon	ornatus		Roewer, 1912	Parascotolemon ornatus Roewer, 1912	species	Neotropical	valid	Kury, Adriano B.
OPIL SP 0352	Checklist	Dataset	Animalia	Arthropoda	Arachnida	Opiliones	Laniatores	Zalmoxoidea	Zalmoxidae		Phalangodinella	araguitensis		González-Sponga, 1987	Phalangodinella araguitensis González-Sponga, 1987	species	Neotropical	valid	Kury, Adriano B.
OPIL SP 0353	Checklist	Dataset	Animalia	Arthropoda	Arachnida	Opiliones	Laniatores	Zalmoxoidea	Zalmoxidae		Phalangodinella	arida		González-Sponga, 1987	Phalangodinella arida González-Sponga, 1987	species	Neotropical	valid	Kury, Adriano B.
OPIL SP 0354	Checklist	Dataset	Animalia	Arthropoda	Arachnida	Opiliones	Laniatores	Zalmoxoidea	Zalmoxidae		Phalangodinella	bicalcanei		González-Sponga, 1987	Phalangodinella bicalcanei González-Sponga, 1987	species	Neotropical	valid	Kury, Adriano B.
OPIL SP 0355	Checklist	Dataset	Animalia	Arthropoda	Arachnida	Opiliones	Laniatores	Zalmoxoidea	Zalmoxidae		Phalangodinella	calcanei		González-Sponga, 1987	Phalangodinella calcanei González-Sponga, 1987	species	Neotropical	valid	Kury, Adriano B.
OPIL SP 0356	Checklist	Dataset	Animalia	Arthropoda	Arachnida	Opiliones	Laniatores	Zalmoxoidea	Zalmoxidae		Phalangodinella	callositas		González-Sponga, 1987	Phalangodinella callositas González-Sponga, 1987	species	Neotropical	valid	Kury, Adriano B.
OPIL SP 0357	Checklist	Dataset	Animalia	Arthropoda	Arachnida	Opiliones	Laniatores	Zalmoxoidea	Zalmoxidae		Phalangodinella	caporiaccoi		González-Sponga, 1987	Phalangodinella caporiaccoi González-Sponga, 1987	species	Neotropical	valid	Kury, Adriano B.
OPIL SP 0358	Checklist	Dataset	Animalia	Arthropoda	Arachnida	Opiliones	Laniatores	Zalmoxoidea	Zalmoxidae		Phalangodinella	coffeicola		González-Sponga, 1987	Phalangodinella coffeicola González-Sponga, 1987	species	Neotropical	valid	Kury, Adriano B.
OPIL SP 0359	Checklist	Dataset	Animalia	Arthropoda	Arachnida	Opiliones	Laniatores	Zalmoxoidea	Zalmoxidae		Phalangodinella	longipes		González-Sponga, 1987	Phalangodinella longipes González-Sponga, 1987	species	Neotropical	valid	Kury, Adriano B.
OPIL SP 0360	Checklist	Dataset	Animalia	Arthropoda	Arachnida	Opiliones	Laniatores	Zalmoxoidea	Zalmoxidae		Phalangodinella	pilosa		González-Sponga, 1987	Phalangodinella pilosa González-Sponga, 1987	species	Neotropical	valid	Kury, Adriano B.
OPIL SP 0361	Checklist	Dataset	Animalia	Arthropoda	Arachnida	Opiliones	Laniatores	Zalmoxoidea	Zalmoxidae		Phalangodinella	pittieri		González-Sponga, 1987	Phalangodinella pittieri González-Sponga, 1987	species	Neotropical	valid	Kury, Adriano B.
OPIL SP 0362	Checklist	Dataset	Animalia	Arthropoda	Arachnida	Opiliones	Laniatores	Zalmoxoidea	Zalmoxidae		Phalangodinella	roeweri		Caporiacco, 1951	Phalangodinella roeweri Caporiacco, 1951	species	Neotropical	valid	Kury, Adriano B.
OPIL SP 0363	Checklist	Dataset	Animalia	Arthropoda	Arachnida	Opiliones	Laniatores	Zalmoxoidea	Zalmoxidae		Phalangodinella	santaeroseae		González-Sponga, 1987	Phalangodinella santaeroseae González-Sponga, 1987	species	Neotropical	valid	Kury, Adriano B.
OPIL SP 0364	Checklist	Dataset	Animalia	Arthropoda	Arachnida	Opiliones	Laniatores	Zalmoxoidea	Zalmoxidae		Phalangodinella	tropophyla		González-Sponga, 1987	Phalangodinella tropophyla González-Sponga, 1987	species	Neotropical	valid	Kury, Adriano B.
OPIL SP 0365	Checklist	Dataset	Animalia	Arthropoda	Arachnida	Opiliones	Laniatores	Zalmoxoidea	Zalmoxidae		Phalangoduna	granosa		Roewer, 1949	Phalangoduna granosa Roewer, 1949	species	Neotropical	valid	Kury, Adriano B.
OPIL SP 0366	Checklist	Dataset	Animalia	Arthropoda	Arachnida	Opiliones	Laniatores	Zalmoxoidea	Zalmoxidae		Pijiguaia	albina		González-Sponga, 1998	Pijiguaia albina González-Sponga, 1998	species	Neotropical	valid	Kury, Adriano B.
OPIL SP 0367	Checklist	Dataset	Animalia	Arthropoda	Arachnida	Opiliones	Laniatores	Zalmoxoidea	Zalmoxidae		Pilosa	pilosa		González-Sponga, 1999	Pilosa pilosa González-Sponga, 1999	species	Neotropical	valid	Kury, Adriano B.
OPIL SP 0368	Checklist	Dataset	Animalia	Arthropoda	Arachnida	Opiliones	Laniatores	Zalmoxoidea	Zalmoxidae		Pirassunungoleptes	analis		(Roewer, 1949)	Pirassunungoleptes analis (Roewer, 1949)	species	Neotropical	valid	Kury, Adriano B.
OPIL SP 0369	Checklist	Dataset	Animalia	Arthropoda	Arachnida	Opiliones	Laniatores	Zalmoxoidea	Zalmoxidae		Pirassunungoleptes	calcaratus		H. Soares, 1966	Pirassunungoleptes calcaratus H. Soares, 1966	species	Neotropical	valid	Kury, Adriano B.
OPIL SP 0370	Checklist	Dataset	Animalia	Arthropoda	Arachnida	Opiliones	Laniatores	Zalmoxoidea	Zalmoxidae		Pirassunungoleptes	lesserti		(Roewer, 1949)	Pirassunungoleptes lesserti (Roewer, 1949)	species	Neotropical	valid	Kury, Adriano B.
OPIL SP 0371	Checklist	Dataset	Animalia	Arthropoda	Arachnida	Opiliones	Laniatores	Zalmoxoidea	Zalmoxidae		Protodiasia	saltensis		Ringuelet, 1955	Protodiasia saltensis Ringuelet, 1955	species	Neotropical	valid	Kury, Adriano B.
OPIL SP 0372	Checklist	Dataset	Animalia	Arthropoda	Arachnida	Opiliones	Laniatores	Zalmoxoidea	Zalmoxidae		Pyropharynx	gracilis		(Pickard-Cambridge, 1905)	Pyropharynx gracilis (Pickard-Cambridge, 1905)	species	Neotropical	valid	Kury, Adriano B.
OPIL SP 0373	Checklist	Dataset	Animalia	Arthropoda	Arachnida	Opiliones	Laniatores	Zalmoxoidea	Zalmoxidae		Retropedis	magnapatella		González-Sponga, 1987	Retropedis magnapatella González-Sponga, 1987	species	Neotropical	valid	Kury, Adriano B.
OPIL SP 0374	Checklist	Dataset	Animalia	Arthropoda	Arachnida	Opiliones	Laniatores	Zalmoxoidea	Zalmoxidae		Sivianus	titschacki		Roewer, 1949	Sivianus titschacki Roewer, 1949	species	Neotropical	valid	Kury, Adriano B.
OPIL SP 0375	Checklist	Dataset	Animalia	Arthropoda	Arachnida	Opiliones	Laniatores	Zalmoxoidea	Zalmoxidae		Soledadiella	barinensis		González-Sponga, 1987	Soledadiella barinensis González-Sponga, 1987	species	Neotropical	valid	Kury, Adriano B.
OPIL SP 0376	Checklist	Dataset	Animalia	Arthropoda	Arachnida	Opiliones	Laniatores	Zalmoxoidea	Zalmoxidae		Soledadiella	macrochelae		González-Sponga, 1987	Soledadiella macrochelae González-Sponga, 1987	species	Neotropical	valid	Kury, Adriano B.
OPIL SP 0377	Checklist	Dataset	Animalia	Arthropoda	Arachnida	Opiliones	Laniatores	Zalmoxoidea	Zalmoxidae		Soledadiella	pentaculeata		González-Sponga, 1999	Soledadiella pentaculeata González-Sponga, 1999	species	Neotropical	valid	Kury, Adriano B.
OPIL SP 0378	Checklist	Dataset	Animalia	Arthropoda	Arachnida	Opiliones	Laniatores	Zalmoxoidea	Zalmoxidae		Soledadiella	roraima		(Goodnight & Goodnight, 1943)	Soledadiella roraima (Goodnight & Goodnight, 1943)	species	Neotropical	valid	Kury, Adriano B.
OPIL SP 0379	Checklist	Dataset	Animalia	Arthropoda	Arachnida	Opiliones	Laniatores	Zalmoxoidea	Zalmoxidae		Sphoeroforma	familiaris		González-Sponga, 1987	Sphoeroforma familiaris González-Sponga, 1987	species	Neotropical	valid	Kury, Adriano B.
OPIL SP 0380	Checklist	Dataset	Animalia	Arthropoda	Arachnida	Opiliones	Laniatores	Zalmoxoidea	Zalmoxidae		Sphoeroforma	fernandezi		González-Sponga, 1987	Sphoeroforma fernandezi González-Sponga, 1987	species	Neotropical	valid	Kury, Adriano B.
OPIL SP 0381	Checklist	Dataset	Animalia	Arthropoda	Arachnida	Opiliones	Laniatores	Zalmoxoidea	Zalmoxidae		Sphoeroforma	minima		González-Sponga, 1987	Sphoeroforma minima González-Sponga, 1987	species	Neotropical	valid	Kury, Adriano B.
OPIL SP 0382	Checklist	Dataset	Animalia	Arthropoda	Arachnida	Opiliones	Laniatores	Zalmoxoidea	Zalmoxidae		Sphoeroforma	pusilla		González-Sponga, 1987	Sphoeroforma pusilla González-Sponga, 1987	species	Neotropical	valid	Kury, Adriano B.
OPIL SP 0383	Checklist	Dataset	Animalia	Arthropoda	Arachnida	Opiliones	Laniatores	Zalmoxoidea	Zalmoxidae		Spiniella	grandituberculosa		González-Sponga, 1987	Spiniella grandituberculosa González-Sponga, 1987	species	Neotropical	valid	Kury, Adriano B.
OPIL SP 0384	Checklist	Dataset	Animalia	Arthropoda	Arachnida	Opiliones	Laniatores	Zalmoxoidea	Zalmoxidae		Stygnoleptes	analis		Banks, 1914	Stygnoleptes analis Banks, 1914	species	Neotropical	valid	Kury, Adriano B.
OPIL SP 0385	Checklist	Dataset	Animalia	Arthropoda	Arachnida	Opiliones	Laniatores	Zalmoxoidea	Zalmoxidae		Stygnoleptes	crassus		(Sørensen, 1932)	Stygnoleptes crassus (Sørensen, 1932)	species	Neotropical	valid	Kury, Adriano B.
OPIL SP 0386	Checklist	Dataset	Animalia	Arthropoda	Arachnida	Opiliones	Laniatores	Zalmoxoidea	Zalmoxidae		Stygnoleptes	gibber		(Roewer, 1954)	Stygnoleptes gibber (Roewer, 1954)	species	Neotropical	valid	Kury, Adriano B.
OPIL SP 0387	Checklist	Dataset	Animalia	Arthropoda	Arachnida	Opiliones	Laniatores	Zalmoxoidea	Zalmoxidae		Stygnoleptes	sellatus		(Roewer, 1954)	Stygnoleptes sellatus (Roewer, 1954)	species	Neotropical	valid	Kury, Adriano B.
OPIL SP 0388	Checklist	Dataset	Animalia	Arthropoda	Arachnida	Opiliones	Laniatores	Zalmoxoidea	Zalmoxidae		Stygnoleptes	tarmanus		(Roewer, 1956)	Stygnoleptes tarmanus (Roewer, 1956)	species	Neotropical	valid	Kury, Adriano B.
OPIL SP 0389	Checklist	Dataset	Animalia	Arthropoda	Arachnida	Opiliones	Laniatores	Zalmoxoidea	Zalmoxidae		Taguaza	eliptica		González-Sponga, 1998	Taguaza eliptica González-Sponga, 1998	species	Neotropical	valid	Kury, Adriano B.
OPIL SP 0390	Checklist	Dataset	Animalia	Arthropoda	Arachnida	Opiliones	Laniatores	Zalmoxoidea	Zalmoxidae		Timoleon	armatanalis		Roewer, 1956	Timoleon armatanalis Roewer, 1956	species	Neotropical	valid	Kury, Adriano B.
OPIL SP 0391	Checklist	Dataset	Animalia	Arthropoda	Arachnida	Opiliones	Laniatores	Zalmoxoidea	Zalmoxidae		Timoleon	crassipes		Sørensen, 1932	Timoleon crassipes Sørensen, 1932	species	Neotropical	valid	Kury, Adriano B.
OPIL SP 0392	Checklist	Dataset	Animalia	Arthropoda	Arachnida	Opiliones	Laniatores	Zalmoxoidea	Zalmoxidae		Traiania	abundantis		González-Sponga, 1987	Traiania abundantis González-Sponga, 1987	species	Neotropical	valid	Kury, Adriano B.
OPIL SP 0393	Checklist	Dataset	Animalia	Arthropoda	Arachnida	Opiliones	Laniatores	Zalmoxoidea	Zalmoxidae		Traiania	arairensis		González-Sponga, 1987	Traiania arairensis González-Sponga, 1987	species	Neotropical	valid	Kury, Adriano B.
OPIL SP 0394	Checklist	Dataset	Animalia	Arthropoda	Arachnida	Opiliones	Laniatores	Zalmoxoidea	Zalmoxidae		Traiania	cacaotera		González-Sponga, 1987	Traiania cacaotera González-Sponga, 1987	species	Neotropical	valid	Kury, Adriano B.
OPIL SP 0395	Checklist	Dataset	Animalia	Arthropoda	Arachnida	Opiliones	Laniatores	Zalmoxoidea	Zalmoxidae		Traiania	cimarronera		González-Sponga, 1987	Traiania cimarronera González-Sponga, 1987	species	Neotropical	valid	Kury, Adriano B.
OPIL SP 0396	Checklist	Dataset	Animalia	Arthropoda	Arachnida	Opiliones	Laniatores	Zalmoxoidea	Zalmoxidae		Traiania	debellardi		González-Sponga, 1991	Traiania debellardi González-Sponga, 1991	species	Neotropical	valid	Kury, Adriano B.
OPIL SP 0397	Checklist	Dataset	Animalia	Arthropoda	Arachnida	Opiliones	Laniatores	Zalmoxoidea	Zalmoxidae		Traiania	inexspectata		González-Sponga, 1987	Traiania inexspectata González-Sponga, 1987	species	Neotropical	valid	Kury, Adriano B.
OPIL SP 0398	Checklist	Dataset	Animalia	Arthropoda	Arachnida	Opiliones	Laniatores	Zalmoxoidea	Zalmoxidae		Traiania	mujicai		González-Sponga, 1987	Traiania mujicai González-Sponga, 1987	species	Neotropical	valid	Kury, Adriano B.
OPIL SP 0399	Checklist	Dataset	Animalia	Arthropoda	Arachnida	Opiliones	Laniatores	Zalmoxoidea	Zalmoxidae		Traiania	orghidani		Soares & Avram, 1981	Traiania orghidani Soares & Avram, 1981	species	Neotropical	valid	Kury, Adriano B.
OPIL SP 0400	Checklist	Dataset	Animalia	Arthropoda	Arachnida	Opiliones	Laniatores	Zalmoxoidea	Zalmoxidae		Traiania	simpatrica		González-Sponga, 1987	Traiania simpatrica González-Sponga, 1987	species	Neotropical	valid	Kury, Adriano B.
OPIL SP 0401	Checklist	Dataset	Animalia	Arthropoda	Arachnida	Opiliones	Laniatores	Zalmoxoidea	Zalmoxidae		Traiania	simplex		González-Sponga, 1987	Traiania simplex González-Sponga, 1987	species	Neotropical	valid	Kury, Adriano B.
OPIL SP 0402	Checklist	Dataset	Animalia	Arthropoda	Arachnida	Opiliones	Laniatores	Zalmoxoidea	Zalmoxidae		Traiania	torrealbai		González-Sponga, 1987	Traiania torrealbai González-Sponga, 1987	species	Neotropical	valid	Kury, Adriano B.
OPIL SP 0403	Checklist	Dataset	Animalia	Arthropoda	Arachnida	Opiliones	Laniatores	Zalmoxoidea	Zalmoxidae		Traiania	triangularis		González-Sponga, 1987	Traiania triangularis González-Sponga, 1987	species	Neotropical	valid	Kury, Adriano B.
OPIL SP 0404	Checklist	Dataset	Animalia	Arthropoda	Arachnida	Opiliones	Laniatores	Zalmoxoidea	Zalmoxidae		Traiania	venadoensis		González-Sponga, 1998	Traiania venadoensis González-Sponga, 1998	species	Neotropical	valid	Kury, Adriano B.
OPIL SP 0405	Checklist	Dataset	Animalia	Arthropoda	Arachnida	Opiliones	Laniatores	Zalmoxoidea	Zalmoxidae		Unare	videodifficultatis		González-Sponga, 1987	Unare videodifficultatis González-Sponga, 1987	species	Neotropical	valid	Kury, Adriano B.
OPIL SP 0406	Checklist	Dataset	Animalia	Arthropoda	Arachnida	Opiliones	Laniatores	Zalmoxoidea	Zalmoxidae		Unicornia	flava		González-Sponga, 1987	Unicornia flava González-Sponga, 1987	species	Neotropical	valid	Kury, Adriano B.
OPIL SP 0407	Checklist	Dataset	Animalia	Arthropoda	Arachnida	Opiliones	Laniatores	Zalmoxoidea	Zalmoxidae		Urachiche	nerysae		González-Sponga, 1987	Urachiche nerysae González-Sponga, 1987	species	Neotropical	valid	Kury, Adriano B.
OPIL SP 0408	Checklist	Dataset	Animalia	Arthropoda	Arachnida	Opiliones	Laniatores	Zalmoxoidea	Zalmoxidae		Venezuelana	absonustarsalis		(González-Sponga, 1987)	Venezuelana absonustarsalis (González-Sponga, 1987)	species	Neotropical	valid	Kury, Adriano B.
OPIL SP 0409	Checklist	Dataset	Animalia	Arthropoda	Arachnida	Opiliones	Laniatores	Zalmoxoidea	Zalmoxidae		Viacha	granulata		Roewer, 1949	Viacha granulata Roewer, 1949	species	Neotropical	valid	Kury, Adriano B.
OPIL SP 0410	Checklist	Dataset	Animalia	Arthropoda	Arachnida	Opiliones	Laniatores	Zalmoxoidea	Zalmoxidae		Weyrauchiana	oxapampa		Roewer, 1952	Weyrauchiana oxapampa Roewer, 1952	species	Neotropical	valid	Kury, Adriano B.
OPIL SP 0411	Checklist	Dataset	Animalia	Arthropoda	Arachnida	Opiliones	Laniatores	Zalmoxoidea	Zalmoxidae		Yacambuia	yacambuiensis		González-Sponga, 1987	Yacambuia yacambuiensis González-Sponga, 1987	species	Neotropical	valid	Kury, Adriano B.
OPIL SP 0412	Checklist	Dataset	Animalia	Arthropoda	Arachnida	Opiliones	Laniatores	Zalmoxoidea	Zalmoxidae		Zalmoxis	armatipes		Strand, 1910	Zalmoxis armatipes Strand, 1910	species	Australasian	valid	Kury, Adriano B.
OPIL SP 0413	Checklist	Dataset	Animalia	Arthropoda	Arachnida	Opiliones	Laniatores	Zalmoxoidea	Zalmoxidae		Zalmoxis	armatus		(Roewer, 1949)	Zalmoxis armatus (Roewer, 1949)	species	Australasian	valid	Kury, Adriano B.
OPIL SP 0414	Checklist	Dataset	Animalia	Arthropoda	Arachnida	Opiliones	Laniatores	Zalmoxoidea	Zalmoxidae		Zalmoxis	aspersus		Roewer, 1949	Zalmoxis aspersus Roewer, 1949	species	Australasian	valid	Kury, Adriano B.
OPIL SP 0415	Checklist	Dataset	Animalia	Arthropoda	Arachnida	Opiliones	Laniatores	Zalmoxoidea	Zalmoxidae		Zalmoxis	austerus		Hirst, 1912	Zalmoxis austerus Hirst, 1912	species	Australasian	valid	Kury, Adriano B.
OPIL SP 0416	Checklist	Dataset	Animalia	Arthropoda	Arachnida	Opiliones	Laniatores	Zalmoxoidea	Zalmoxidae		Zalmoxis	australis		(Roewer, 1949)	Zalmoxis australis (Roewer, 1949)	species	Australasian	valid	Kury, Adriano B.
OPIL SP 0417	Checklist	Dataset	Animalia	Arthropoda	Arachnida	Opiliones	Laniatores	Zalmoxoidea	Zalmoxidae		Zalmoxis	bendis		Sharma et al., 2012	Zalmoxis bendis Sharma et al., 2012	species	Indomalayan	valid	Kury, Adriano B.
OPIL SP 0418	Checklist	Dataset	Animalia	Arthropoda	Arachnida	Opiliones	Laniatores	Zalmoxoidea	Zalmoxidae		Zalmoxis	bonka		(Forster, 1949)	Zalmoxis bonka (Forster, 1949)	species	Australasian	valid	Kury, Adriano B.
OPIL SP 0419	Checklist	Dataset	Animalia	Arthropoda	Arachnida	Opiliones	Laniatores	Zalmoxoidea	Zalmoxidae		Zalmoxis	brevipes		(Roewer, 1949)	Zalmoxis brevipes (Roewer, 1949)	species	Australasian	valid	Kury, Adriano B.
OPIL SP 0420	Checklist	Dataset	Animalia	Arthropoda	Arachnida	Opiliones	Laniatores	Zalmoxoidea	Zalmoxidae		Zalmoxis	cardwellensis		Foster, 1955	Zalmoxis cardwellensis Foster, 1955	species	Australasian	valid	Kury, Adriano B.
OPIL SP 0421	Checklist	Dataset	Animalia	Arthropoda	Arachnida	Opiliones	Laniatores	Zalmoxoidea	Zalmoxidae		Zalmoxis	cheesmani		(Roewer, 1949)	Zalmoxis cheesmani (Roewer, 1949)	species	Australasian	valid	Kury, Adriano B.
OPIL SP 0422	Checklist	Dataset	Animalia	Arthropoda	Arachnida	Opiliones	Laniatores	Zalmoxoidea	Zalmoxidae		Zalmoxis	convexus		(Roewer, 1949)	Zalmoxis convexus (Roewer, 1949)	species	Australasian	valid	Kury, Adriano B.
OPIL SP 0423	Checklist	Dataset	Animalia	Arthropoda	Arachnida	Opiliones	Laniatores	Zalmoxoidea	Zalmoxidae		Zalmoxis	crassitarsis		Suzuki, 1982	Zalmoxis crassitarsis Suzuki, 1982	species	Australasian	valid	Kury, Adriano B.
OPIL SP 0424	Checklist	Dataset	Animalia	Arthropoda	Arachnida	Opiliones	Laniatores	Zalmoxoidea	Zalmoxidae		Zalmoxis	cuspanalis		(Roewer, 1927)	Zalmoxis cuspanalis (Roewer, 1927)	species	Indomalayan	valid	Kury, Adriano B.
OPIL SP 0425	Checklist	Dataset	Animalia	Arthropoda	Arachnida	Opiliones	Laniatores	Zalmoxoidea	Zalmoxidae		Zalmoxis	dammermani		(Roewer, 1927)	Zalmoxis dammermani (Roewer, 1927)	species	Indomalayan	valid	Kury, Adriano B.
OPIL SP 0426	Checklist	Dataset	Animalia	Arthropoda	Arachnida	Opiliones	Laniatores	Zalmoxoidea	Zalmoxidae		Zalmoxis	darwinensis		(Goodnight & Goodnight, 1948)	Zalmoxis darwinensis (Goodnight & Goodnight, 1948)	species	Australasian	valid	Kury, Adriano B.
OPIL SP 0427	Checklist	Dataset	Animalia	Arthropoda	Arachnida	Opiliones	Laniatores	Zalmoxoidea	Zalmoxidae		Zalmoxis	derzelas		Sharma et al., 2012	Zalmoxis derzelas Sharma et al., 2012	species	Indomalayan	valid	Kury, Adriano B.
OPIL SP 0428	Checklist	Dataset	Animalia	Arthropoda	Arachnida	Opiliones	Laniatores	Zalmoxoidea	Zalmoxidae		Zalmoxis	falcifer		Sharma, 2012	Zalmoxis falcifer Sharma, 2012	species	Australasian	valid	Kury, Adriano B.
OPIL SP 0429	Checklist	Dataset	Animalia	Arthropoda	Arachnida	Opiliones	Laniatores	Zalmoxoidea	Zalmoxidae		Zalmoxis	ferrugineus		(Roewer, 1912)	Zalmoxis ferrugineus (Roewer, 1912)	species	Afrotropical	valid	Kury, Adriano B.
OPIL SP 0430	Checklist	Dataset	Animalia	Arthropoda	Arachnida	Opiliones	Laniatores	Zalmoxoidea	Zalmoxidae		Zalmoxis	furcifer		Sharma, 2012	Zalmoxis furcifer Sharma, 2012	species	Australasian	valid	Kury, Adriano B.
OPIL SP 0431	Checklist	Dataset	Animalia	Arthropoda	Arachnida	Opiliones	Laniatores	Zalmoxoidea	Zalmoxidae		Zalmoxis	gebeleizis		Sharma et al., 2012	Zalmoxis gebeleizis Sharma et al., 2012	species	Indomalayan	valid	Kury, Adriano B.
OPIL SP 0432	Checklist	Dataset	Animalia	Arthropoda	Arachnida	Opiliones	Laniatores	Zalmoxoidea	Zalmoxidae		Zalmoxis	granulatus		(Loman, 1902)	Zalmoxis granulatus (Loman, 1902)	species	Australasian	valid	Kury, Adriano B.
OPIL SP 0433	Checklist	Dataset	Animalia	Arthropoda	Arachnida	Opiliones	Laniatores	Zalmoxoidea	Zalmoxidae		Zalmoxis	heynemani		Suzuki, 1977	Zalmoxis heynemani Suzuki, 1977	species	Indomalayan	valid	Kury, Adriano B.
OPIL SP 0434	Checklist	Dataset	Animalia	Arthropoda	Arachnida	Opiliones	Laniatores	Zalmoxoidea	Zalmoxidae		Zalmoxis	insula		Forster, 1955	Zalmoxis insula Forster, 1955	species	Australasian	valid	Kury, Adriano B.
OPIL SP 0435	Checklist	Dataset	Animalia	Arthropoda	Arachnida	Opiliones	Laniatores	Zalmoxoidea	Zalmoxidae		Zalmoxis	insularis		(Roewer, 1949)	Zalmoxis insularis (Roewer, 1949)	species	Australasian	valid	Kury, Adriano B.
OPIL SP 0436	Checklist	Dataset	Animalia	Arthropoda	Arachnida	Opiliones	Laniatores	Zalmoxoidea	Zalmoxidae		Zalmoxis	jewetti		(Goodnight & Goodnight, 1947)	Zalmoxis jewetti (Goodnight & Goodnight, 1947)	species	Australasian	valid	Kury, Adriano B.
OPIL SP 0437	Checklist	Dataset	Animalia	Arthropoda	Arachnida	Opiliones	Laniatores	Zalmoxoidea	Zalmoxidae		Zalmoxis	kaiensis		Suzuki, 1982	Zalmoxis kaiensis Suzuki, 1982	species	Indomalayan	valid	Kury, Adriano B.
OPIL SP 0438	Checklist	Dataset	Animalia	Arthropoda	Arachnida	Opiliones	Laniatores	Zalmoxoidea	Zalmoxidae		Zalmoxis	kaktinsae		Sharma, 2012	Zalmoxis kaktinsae Sharma, 2012	species	Australasian	valid	Kury, Adriano B.
OPIL SP 0439	Checklist	Dataset	Animalia	Arthropoda	Arachnida	Opiliones	Laniatores	Zalmoxoidea	Zalmoxidae		Zalmoxis	kotys		Sharma et al., 2012	Zalmoxis kotys Sharma et al., 2012	species	Indomalayan	valid	Kury, Adriano B.
OPIL SP 0440	Checklist	Dataset	Animalia	Arthropoda	Arachnida	Opiliones	Laniatores	Zalmoxoidea	Zalmoxidae		Zalmoxis	lavacaverna		Hunt, 1993	Zalmoxis lavacaverna Hunt, 1993	species	Australasian	valid	Kury, Adriano B.
OPIL SP 0441	Checklist	Dataset	Animalia	Arthropoda	Arachnida	Opiliones	Laniatores	Zalmoxoidea	Zalmoxidae		Zalmoxis	lavongaiensis		Suzuki, 1985	Zalmoxis lavongaiensis Suzuki, 1985	species	Australasian	valid	Kury, Adriano B.
OPIL SP 0442	Checklist	Dataset	Animalia	Arthropoda	Arachnida	Opiliones	Laniatores	Zalmoxoidea	Zalmoxidae		Zalmoxis	luzonicus		Roewer, 1949	Zalmoxis luzonicus Roewer, 1949	species	Indomalayan	valid	Kury, Adriano B.
OPIL SP 0443	Checklist	Dataset	Animalia	Arthropoda	Arachnida	Opiliones	Laniatores	Zalmoxoidea	Zalmoxidae		Zalmoxis	maculosus		(Roewer, 1949)	Zalmoxis maculosus (Roewer, 1949)	species	Australasian	valid	Kury, Adriano B.
OPIL SP 0444	Checklist	Dataset	Animalia	Arthropoda	Arachnida	Opiliones	Laniatores	Zalmoxoidea	Zalmoxidae		Zalmoxis	marchei		Roewer, 1912	Zalmoxis marchei Roewer, 1912	species	Australasian	valid	Kury, Adriano B.
OPIL SP 0445	Checklist	Dataset	Animalia	Arthropoda	Arachnida	Opiliones	Laniatores	Zalmoxoidea	Zalmoxidae		Zalmoxis	mendax		Sharma, 2012	Zalmoxis mendax Sharma, 2012	species	Australasian	valid	Kury, Adriano B.
OPIL SP 0446	Checklist	Dataset	Animalia	Arthropoda	Arachnida	Opiliones	Laniatores	Zalmoxoidea	Zalmoxidae		Zalmoxis	mindanaonicus		Suzuki, 1977	Zalmoxis mindanaonicus Suzuki, 1977	species	Indomalayan	valid	Kury, Adriano B.
OPIL SP 0447	Checklist	Dataset	Animalia	Arthropoda	Arachnida	Opiliones	Laniatores	Zalmoxoidea	Zalmoxidae		Zalmoxis	minimus		Roewer, 1912	Zalmoxis minimus Roewer, 1912	species	Australasian	valid	Kury, Adriano B.
OPIL SP 0448	Checklist	Dataset	Animalia	Arthropoda	Arachnida	Opiliones	Laniatores	Zalmoxoidea	Zalmoxidae		Zalmoxis	mitobatipes		(Roewer, 1926)	Zalmoxis mitobatipes (Roewer, 1926)	species	Indomalayan	valid	Kury, Adriano B.
OPIL SP 0449	Checklist	Dataset	Animalia	Arthropoda	Arachnida	Opiliones	Laniatores	Zalmoxoidea	Zalmoxidae		Zalmoxis	muelleri		Sharma et al., 2011	Zalmoxis muelleri Sharma et al., 2011	species	Australasian	valid	Kury, Adriano B.
OPIL SP 0450	Checklist	Dataset	Animalia	Arthropoda	Arachnida	Opiliones	Laniatores	Zalmoxoidea	Zalmoxidae		Zalmoxis	mutus		Sharma et al., 2011	Zalmoxis mutus Sharma et al., 2011	species	Australasian	valid	Kury, Adriano B.
OPIL SP 0451	Checklist	Dataset	Animalia	Arthropoda	Arachnida	Opiliones	Laniatores	Zalmoxoidea	Zalmoxidae		Zalmoxis	neobritanicus		Suzuki, 1982	Zalmoxis neobritanicus Suzuki, 1982	species	Australasian	valid	Kury, Adriano B.
OPIL SP 0452	Checklist	Dataset	Animalia	Arthropoda	Arachnida	Opiliones	Laniatores	Zalmoxoidea	Zalmoxidae		Zalmoxis	neocaledonicus		Roewer, 1912	Zalmoxis neocaledonicus Roewer, 1912	species	Australasian	valid	Kury, Adriano B.
OPIL SP 0453	Checklist	Dataset	Animalia	Arthropoda	Arachnida	Opiliones	Laniatores	Zalmoxoidea	Zalmoxidae		Zalmoxis	neoguinensis		(Roewer, 1915)	Zalmoxis neoguinensis (Roewer, 1915)	species	Australasian	valid	Kury, Adriano B.
OPIL SP 0454	Checklist	Dataset	Animalia	Arthropoda	Arachnida	Opiliones	Laniatores	Zalmoxoidea	Zalmoxidae		Zalmoxis	occidentalis		(Roewer, 1949)	Zalmoxis occidentalis (Roewer, 1949)	species	Afrotropical	valid	Kury, Adriano B.
OPIL SP 0455	Checklist	Dataset	Animalia	Arthropoda	Arachnida	Opiliones	Laniatores	Zalmoxoidea	Zalmoxidae		Zalmoxis	pallidus		(Roewer, 1915)	Zalmoxis pallidus (Roewer, 1915)	species	Australasian	valid	Kury, Adriano B.
OPIL SP 0456	Checklist	Dataset	Animalia	Arthropoda	Arachnida	Opiliones	Laniatores	Zalmoxoidea	Zalmoxidae		Zalmoxis	patellaris		(Roewer, 1949)	Zalmoxis patellaris (Roewer, 1949)	species	Australasian	valid	Kury, Adriano B.
OPIL SP 0457	Checklist	Dataset	Animalia	Arthropoda	Arachnida	Opiliones	Laniatores	Zalmoxoidea	Zalmoxidae		Zalmoxis	perditus		Sharma, 2012	Zalmoxis perditus Sharma, 2012	species	Australasian	valid	Kury, Adriano B.
OPIL SP 0458	Checklist	Dataset	Animalia	Arthropoda	Arachnida	Opiliones	Laniatores	Zalmoxoidea	Zalmoxidae		Zalmoxis	ponapeus		(Roewer, 1949)	Zalmoxis ponapeus (Roewer, 1949)	species	Australasian	valid	Kury, Adriano B.
OPIL SP 0459	Checklist	Dataset	Animalia	Arthropoda	Arachnida	Opiliones	Laniatores	Zalmoxoidea	Zalmoxidae		Zalmoxis	princeps		Sharma, 2012	Zalmoxis princeps Sharma, 2012	species	Australasian	valid	Kury, Adriano B.
OPIL SP 0460	Checklist	Dataset	Animalia	Arthropoda	Arachnida	Opiliones	Laniatores	Zalmoxoidea	Zalmoxidae		Zalmoxis	pumilus		(Roewer, 1949)	Zalmoxis pumilus (Roewer, 1949)	species	Australasian	valid	Kury, Adriano B.
OPIL SP 0461	Checklist	Dataset	Animalia	Arthropoda	Arachnida	Opiliones	Laniatores	Zalmoxoidea	Zalmoxidae		Zalmoxis	pygmaeus		Sørensen, 1886	Zalmoxis pygmaeus Sørensen, 1886	species	Australasian	valid	Kury, Adriano B.
OPIL SP 0462	Checklist	Dataset	Animalia	Arthropoda	Arachnida	Opiliones	Laniatores	Zalmoxoidea	Zalmoxidae		Zalmoxis	remingtoni		(Goodnight & Goodnight, 1948)	Zalmoxis remingtoni (Goodnight & Goodnight, 1948)	species	Australasian	valid	Kury, Adriano B.
OPIL SP 0463	Checklist	Dataset	Animalia	Arthropoda	Arachnida	Opiliones	Laniatores	Zalmoxoidea	Zalmoxidae		Zalmoxis	robustus		Sørensen, 1886	Zalmoxis robustus Sørensen, 1886	species	Australasian	valid	Kury, Adriano B.
OPIL SP 0464	Checklist	Dataset	Animalia	Arthropoda	Arachnida	Opiliones	Laniatores	Zalmoxoidea	Zalmoxidae		Zalmoxis	sabazios		Sharma et al., 2012	Zalmoxis sabazios Sharma et al., 2012	species	Indomalayan	valid	Kury, Adriano B.
OPIL SP 0465	Checklist	Dataset	Animalia	Arthropoda	Arachnida	Opiliones	Laniatores	Zalmoxoidea	Zalmoxidae		Zalmoxis	sarasinorum		Roewer, 1914	Zalmoxis sarasinorum Roewer, 1914	species	Indomalayan	valid	Kury, Adriano B.
OPIL SP 0466	Checklist	Dataset	Animalia	Arthropoda	Arachnida	Opiliones	Laniatores	Zalmoxoidea	Zalmoxidae		Zalmoxis	savesi		(Simon, 1880)	Zalmoxis savesi (Simon, 1880)	species	Australasian	valid	Kury, Adriano B.
OPIL SP 0467	Checklist	Dataset	Animalia	Arthropoda	Arachnida	Opiliones	Laniatores	Zalmoxoidea	Zalmoxidae		Zalmoxis	sepikus		(Roewer, 1949)	Zalmoxis sepikus (Roewer, 1949)	species	Australasian	valid	Kury, Adriano B.
OPIL SP 0468	Checklist	Dataset	Animalia	Arthropoda	Arachnida	Opiliones	Laniatores	Zalmoxoidea	Zalmoxidae		Zalmoxis	similis		Suzuki, 1982	Zalmoxis similis Suzuki, 1982	species	Australasian	valid	Kury, Adriano B.
OPIL SP 0469	Checklist	Dataset	Animalia	Arthropoda	Arachnida	Opiliones	Laniatores	Zalmoxoidea	Zalmoxidae		Zalmoxis	solitarius		(Roewer, 1917)	Zalmoxis solitarius (Roewer, 1917)	species	Australasian	valid	Kury, Adriano B.
OPIL SP 0470	Checklist	Dataset	Animalia	Arthropoda	Arachnida	Opiliones	Laniatores	Zalmoxoidea	Zalmoxidae		Zalmoxis	sorenseni		Simon, 1892	Zalmoxis sorenseni Simon, 1892	species	Indomalayan	valid	Kury, Adriano B.
OPIL SP 0471	Checklist	Dataset	Animalia	Arthropoda	Arachnida	Opiliones	Laniatores	Zalmoxoidea	Zalmoxidae		Zalmoxis	spinicoxa		Roewer, 1949	Zalmoxis spinicoxa Roewer, 1949	species	Australasian	valid	Kury, Adriano B.
OPIL SP 0472	Checklist	Dataset	Animalia	Arthropoda	Arachnida	Opiliones	Laniatores	Zalmoxoidea	Zalmoxidae		Zalmoxis	thorelli		Sharma et al., 2011	Zalmoxis thorelli Sharma et al., 2011	species	Australasian	valid	Kury, Adriano B.
OPIL SP 0473	Checklist	Dataset	Animalia	Arthropoda	Arachnida	Opiliones	Laniatores	Zalmoxoidea	Zalmoxidae		Zalmoxis	tristis		(Thorell, 1891)	Zalmoxis tristis (Thorell, 1891)	species	Australasian	valid	Kury, Adriano B.
OPIL SP 0474	Checklist	Dataset	Animalia	Arthropoda	Arachnida	Opiliones	Laniatores	Zalmoxoidea	Zalmoxidae		Zalmoxis	tuberculatus		(Goodnight & Goodnight, 1948)	Zalmoxis tuberculatus (Goodnight & Goodnight, 1948)	species	Australasian	valid	Kury, Adriano B.
OPIL SP 0475	Checklist	Dataset	Animalia	Arthropoda	Arachnida	Opiliones	Laniatores	Zalmoxoidea	Zalmoxidae		Zalmoxis	zibelthiurdos		Sharma et al., 2012	Zalmoxis zibelthiurdos Sharma et al., 2012	species	Indomalayan	valid	Kury, Adriano B.
OPIL SP 0476	Checklist	Dataset	Animalia	Arthropoda	Arachnida	Opiliones	Laniatores	Zalmoxoidea			Phalangodella	aequatorialis		Roewer, 1912	Phalangodella aequatorialis Roewer, 1912	species	Neotropical	valid	Kury, Adriano B.
OPIL SP 0477	Checklist	Dataset	Animalia	Arthropoda	Arachnida	Opiliones	Laniatores	Zalmoxoidea			Phalangodella	flavipes		(Mello-Leitão, 1949)	Phalangodella flavipes (Mello-Leitão, 1949)	species	Neotropical	valid	Kury, Adriano B.
OPIL SP 0478	Checklist	Dataset	Animalia	Arthropoda	Arachnida	Opiliones	Laniatores	Zalmoxoidea			Phalangodella	fulvescens		(Mello-Leitão, 1943)	Phalangodella fulvescens (Mello-Leitão, 1943)	species	Neotropical	valid	Kury, Adriano B.
OPIL SP 0479	Checklist	Dataset	Animalia	Arthropoda	Arachnida	Opiliones	Laniatores	Zalmoxoidea			Phalangodella	milagroi		(Mello-Leitão, 1942)	Phalangodella milagroi (Mello-Leitão, 1942)	species	Neotropical	valid	Kury, Adriano B.
OPIL SP 0480	Checklist	Dataset	Animalia	Arthropoda	Arachnida	Opiliones	Laniatores	Zalmoxoidea			Phalangodella	rhinoceros		(Mello-Leitão, 1945)	Phalangodella rhinoceros (Mello-Leitão, 1945)	species	Neotropical	valid	Kury, Adriano B.
OPIL SP 0481	Checklist	Dataset	Animalia	Arthropoda	Arachnida	Opiliones	Laniatores	Zalmoxoidea			Phalangodella	rugipes		(Roewer, 1949)	Phalangodella rugipes (Roewer, 1949)	species	Neotropical	valid	Kury, Adriano B.
OPIL SP 0482	Checklist	Dataset	Animalia	Arthropoda	Arachnida	Opiliones	Laniatores	Zalmoxoidea			Phalangodella	urarmata		(Roewer, 1949)	Phalangodella urarmata (Roewer, 1949)	species	Neotropical	valid	Kury, Adriano B.
OPIL SP 0483	Checklist	Dataset	Animalia	Arthropoda	Arachnida	Opiliones	Laniatores				Alpazia	minima		(Roewer, 1949)	Alpazia minima (Roewer, 1949)	species	Neotropical	valid	Kury, Adriano B.
OPIL SP 0484	Checklist	Dataset	Animalia	Arthropoda	Arachnida	Opiliones	Laniatores				Anamota	custodiens		Šilhavý, 1979	Anamota custodiens Šilhavý, 1979	species	Neotropical	valid	Kury, Adriano B.
OPIL SP 0485	Checklist	Dataset	Animalia	Arthropoda	Arachnida	Opiliones	Laniatores				Arulla	parvula		Suzuki, 1969	Arulla parvula Suzuki, 1969	species	Indomalayan	valid	Kury, Adriano B.
OPIL SP 0486	Checklist	Dataset	Animalia	Arthropoda	Arachnida	Opiliones	Laniatores				Ausulus	minutus		Roewer, 1927	Ausulus minutus Roewer, 1927	species	Indomalayan	valid	Kury, Adriano B.
OPIL SP 0487	Checklist	Dataset	Animalia	Arthropoda	Arachnida	Opiliones	Laniatores				Babrius	murcidus		Thorell, 1891	Babrius murcidus Thorell, 1891	species	Indomalayan	valid	Kury, Adriano B.
OPIL SP 0488	Checklist	Dataset	Animalia	Arthropoda	Arachnida	Opiliones	Laniatores				Bebedoura	rugosa		Roewer, 1949	Bebedoura rugosa Roewer, 1949	species	Neotropical	valid	Kury, Adriano B.
OPIL SP 0489	Checklist	Dataset	Animalia	Arthropoda	Arachnida	Opiliones	Laniatores				Belemarua	nitens		(Soares & Soares, 1946)	Belemarua nitens (Soares & Soares, 1946)	species	Neotropical	valid	Kury, Adriano B.
OPIL SP 0490	Checklist	Dataset	Animalia	Arthropoda	Arachnida	Opiliones	Laniatores				Biconibunus	fuscus		Roewer, 1915	Biconibunus fuscus Roewer, 1915	species	Indomalayan	valid	Kury, Adriano B.
OPIL SP 0491	Checklist	Dataset	Animalia	Arthropoda	Arachnida	Opiliones	Laniatores				Bindoona	glauerti		Roewer, 1929	Bindoona glauerti Roewer, 1929	species	Australasian	valid	Kury, Adriano B.
OPIL SP 0492	Checklist	Dataset	Animalia	Arthropoda	Arachnida	Opiliones	Laniatores				Bissopius	rugosus		Roewer, 1949	Bissopius rugosus Roewer, 1949	species	Neotropical	valid	Kury, Adriano B.
OPIL SP 0493	Checklist	Dataset	Animalia	Arthropoda	Arachnida	Opiliones	Laniatores				Caecobunus	termitarum		Roewer, 1927	Caecobunus termitarum Roewer, 1927	species	Neotropical	valid	Kury, Adriano B.
OPIL SP 0494	Checklist	Dataset	Animalia	Arthropoda	Arachnida	Opiliones	Laniatores				Caribula	longimana		Šilhavý, 1979	Caribula longimana Šilhavý, 1979	species	Neotropical	valid	Kury, Adriano B.
OPIL SP 0495	Checklist	Dataset	Animalia	Arthropoda	Arachnida	Opiliones	Laniatores				Cleombrotus	minutus		Sørensen, 1932	Cleombrotus minutus Sørensen, 1932	species	Neotropical	valid	Kury, Adriano B.
OPIL SP 0496	Checklist	Dataset	Animalia	Arthropoda	Arachnida	Opiliones	Laniatores				Contuor	novum		Roewer, 1963	Contuor novum Roewer, 1963	species	Neotropical	valid	Kury, Adriano B.
OPIL SP 0497	Checklist	Dataset	Animalia	Arthropoda	Arachnida	Opiliones	Laniatores				Costabrimma	cruzensis		Goodnight & Goodnight, 1983	Costabrimma cruzensis Goodnight & Goodnight, 1983	species	Neotropical	valid	Kury, Adriano B.
OPIL SP 0498	Checklist	Dataset	Animalia	Arthropoda	Arachnida	Opiliones	Laniatores				Costabrimma	nicoyensis		Goodnight & Goodnight, 1983	Costabrimma nicoyensis Goodnight & Goodnight, 1983	species	Neotropical	valid	Kury, Adriano B.
OPIL SP 0499	Checklist	Dataset	Animalia	Arthropoda	Arachnida	Opiliones	Laniatores				Costabrimma	terrena		Goodnight & Goodnight, 1983	Costabrimma terrena Goodnight & Goodnight, 1983	species	Neotropical	valid	Kury, Adriano B.
OPIL SP 0500	Checklist	Dataset	Animalia	Arthropoda	Arachnida	Opiliones	Laniatores				Detlefilus	trispinosus		Roewer, 1949	Detlefilus trispinosus Roewer, 1949	species	Neotropical	valid	Kury, Adriano B.
OPIL SP 0501	Checklist	Dataset	Animalia	Arthropoda	Arachnida	Opiliones	Laniatores				Gjellerupia	minima		Roewer, 1915	Gjellerupia minima Roewer, 1915	species	Australasian	valid	Kury, Adriano B.
OPIL SP 0502	Checklist	Dataset	Animalia	Arthropoda	Arachnida	Opiliones	Laniatores				Gjellerupia	neoguinensis		Roewer, 1913	Gjellerupia neoguinensis Roewer, 1913	species	Australasian	valid	Kury, Adriano B.
OPIL SP 0503	Checklist	Dataset	Animalia	Arthropoda	Arachnida	Opiliones	Laniatores				Gunturius	glaber		Roewer, 1949	Gunturius glaber Roewer, 1949	species	Indomalayan	valid	Kury, Adriano B.
OPIL SP 0504	Checklist	Dataset	Animalia	Arthropoda	Arachnida	Opiliones	Laniatores				Heterobabrius	atroluteus		Roewer, 1915	Heterobabrius atroluteus Roewer, 1915	species	Indomalayan	valid	Kury, Adriano B.
OPIL SP 0505	Checklist	Dataset	Animalia	Arthropoda	Arachnida	Opiliones	Laniatores				Heterobabrius	granulatus		Roewer, 1927	Heterobabrius granulatus Roewer, 1927	species	Indomalayan	valid	Kury, Adriano B.
OPIL SP 0506	Checklist	Dataset	Animalia	Arthropoda	Arachnida	Opiliones	Laniatores				Ignacianulus	pumilio		Roewer, 1957	Ignacianulus pumilio Roewer, 1957	species	Neotropical	valid	Kury, Adriano B.
OPIL SP 0507	Checklist	Dataset	Animalia	Arthropoda	Arachnida	Opiliones	Laniatores				Isaeolus	zilchi		Roewer, 1954	Isaeolus zilchi Roewer, 1954	species	Neotropical	valid	Kury, Adriano B.
OPIL SP 0508	Checklist	Dataset	Animalia	Arthropoda	Arachnida	Opiliones	Laniatores				Jimeneziella	decui		Avram, 1970	Jimeneziella decui Avram, 1970	species	Neotropical	valid	Kury, Adriano B.
OPIL SP 0509	Checklist	Dataset	Animalia	Arthropoda	Arachnida	Opiliones	Laniatores				Jimeneziella	negreai		Avram, 1970	Jimeneziella negreai Avram, 1970	species	Neotropical	valid	Kury, Adriano B.
OPIL SP 0510	Checklist	Dataset	Animalia	Arthropoda	Arachnida	Opiliones	Laniatores				Johorella	simplex		Roewer, 1949	Johorella simplex Roewer, 1949	species	Indomalayan	valid	Kury, Adriano B.
OPIL SP 0511	Checklist	Dataset	Animalia	Arthropoda	Arachnida	Opiliones	Laniatores				Kokoda	luteoscutum		Roewer, 1949	Kokoda luteoscutum Roewer, 1949	species	Australasian	valid	Kury, Adriano B.
OPIL SP 0512	Checklist	Dataset	Animalia	Arthropoda	Arachnida	Opiliones	Laniatores				Liomma	laeve		Roewer, 1959	Liomma laeve Roewer, 1959	species	Neotropical	valid	Kury, Adriano B.
OPIL SP 0513	Checklist	Dataset	Animalia	Arthropoda	Arachnida	Opiliones	Laniatores				Manuelangelia	tuberosa		(González-Sponga, 1998)	Manuelangelia tuberosa (González-Sponga, 1998)	species	Neotropical	valid	Kury, Adriano B.
OPIL SP 0514	Checklist	Dataset	Animalia	Arthropoda	Arachnida	Opiliones	Laniatores				Metaconomma	femorale		Pickard-Cambridge, 1905	Metaconomma femorale Pickard-Cambridge, 1905	species	Neotropical	valid	Kury, Adriano B.
OPIL SP 0515	Checklist	Dataset	Animalia	Arthropoda	Arachnida	Opiliones	Laniatores				Metapellobunus	lapidosus		Roewer, 1928	Metapellobunus lapidosus Roewer, 1928	species	Neotropical	valid	Kury, Adriano B.
OPIL SP 0516	Checklist	Dataset	Animalia	Arthropoda	Arachnida	Opiliones	Laniatores				Metapellobunus	unicolor		(Roewer, 1912)	Metapellobunus unicolor (Roewer, 1912)	species	Neotropical	valid	Kury, Adriano B.
OPIL SP 0517	Checklist	Dataset	Animalia	Arthropoda	Arachnida	Opiliones	Laniatores				Micrisaeus	gracillimus		Roewer, 1957	Micrisaeus gracillimus Roewer, 1957	species	Neotropical	valid	Kury, Adriano B.
OPIL SP 0518	Checklist	Dataset	Animalia	Arthropoda	Arachnida	Opiliones	Laniatores				Microconomma	armatipes		Roewer, 1915	Microconomma armatipes Roewer, 1915	species	Afrotropical	valid	Kury, Adriano B.
OPIL SP 0519	Checklist	Dataset	Animalia	Arthropoda	Arachnida	Opiliones	Laniatores				Mirda	insulanus		(Banks, 1901)	Mirda insulanus (Banks, 1901)	species	Neotropical	valid	Kury, Adriano B.
OPIL SP 0520	Checklist	Dataset	Animalia	Arthropoda	Arachnida	Opiliones	Laniatores				Munis	multivirgatus		Roewer, 1963	Munis multivirgatus Roewer, 1963	species	Neotropical	valid	Kury, Adriano B.
OPIL SP 0521	Checklist	Dataset	Animalia	Arthropoda	Arachnida	Opiliones	Laniatores				Neoparalus	granitus		(Roewer, 1949)	Neoparalus granitus (Roewer, 1949)	species	Neotropical	valid	Kury, Adriano B.
OPIL SP 0522	Checklist	Dataset	Animalia	Arthropoda	Arachnida	Opiliones	Laniatores				Neoscotolemon	lutzi		Goodnight & Goodnight, 1942	Neoscotolemon lutzi Goodnight & Goodnight, 1942	species	Neotropical	valid	Kury, Adriano B.
OPIL SP 0523	Checklist	Dataset	Animalia	Arthropoda	Arachnida	Opiliones	Laniatores				Neoscotolemon	pictipes		(Banks, 1908)	Neoscotolemon pictipes (Banks, 1908)	species	Neotropical	valid	Kury, Adriano B.
OPIL SP 0524	Checklist	Dataset	Animalia	Arthropoda	Arachnida	Opiliones	Laniatores				Octophthalmus	marginatus		Wood, 1869	Octophthalmus marginatus Wood, 1869	species	Neotropical	valid	Kury, Adriano B.
OPIL SP 0525	Checklist	Dataset	Animalia	Arthropoda	Arachnida	Opiliones	Laniatores				Ortizia	gracilipes		Roewer, 1952	Ortizia gracilipes Roewer, 1952	species	Neotropical	valid	Kury, Adriano B.
OPIL SP 0526	Checklist	Dataset	Animalia	Arthropoda	Arachnida	Opiliones	Laniatores				Ostracidium	decoratum		Kollar, 1839	Ostracidium decoratum Kollar, 1839	species	Neotropical	valid	Kury, Adriano B.
OPIL SP 0527	Checklist	Dataset	Animalia	Arthropoda	Arachnida	Opiliones	Laniatores				Ostracidium	fuscum		Perty, 1833	Ostracidium fuscum Perty, 1833	species	Neotropical	valid	Kury, Adriano B.
OPIL SP 0528	Checklist	Dataset	Animalia	Arthropoda	Arachnida	Opiliones	Laniatores				Ostracidium	succineum		Perty, 1833	Ostracidium succineum Perty, 1833	species	Neotropical	valid	Kury, Adriano B.
OPIL SP 0529	Checklist	Dataset	Animalia	Arthropoda	Arachnida	Opiliones	Laniatores				Parabupares	robustus		Suzuki, 1982	Parabupares robustus Suzuki, 1982	species	Indomalayan	valid	Kury, Adriano B.
OPIL SP 0530	Checklist	Dataset	Animalia	Arthropoda	Arachnida	Opiliones	Laniatores				Paraconomma	argentinum		Roewer, 1915	Paraconomma argentinum Roewer, 1915	species	Neotropical	valid	Kury, Adriano B.
OPIL SP 0531	Checklist	Dataset	Animalia	Arthropoda	Arachnida	Opiliones	Laniatores				Paraconomma	ovale		Goodnight & Goodnight, 1942	Paraconomma ovale Goodnight & Goodnight, 1942	species	Neotropical	valid	Kury, Adriano B.
OPIL SP 0532	Checklist	Dataset	Animalia	Arthropoda	Arachnida	Opiliones	Laniatores				Paraconomma	spinooculorum		Goodnight & Goodnight, 1942	Paraconomma spinooculorum Goodnight & Goodnight, 1942	species	Neotropical	valid	Kury, Adriano B.
OPIL SP 0533	Checklist	Dataset	Animalia	Arthropoda	Arachnida	Opiliones	Laniatores				Paraphalangodus	synacanthus		Roewer, 1915	Paraphalangodus synacanthus Roewer, 1915	species	Neotropical	valid	Kury, Adriano B.
OPIL SP 0534	Checklist	Dataset	Animalia	Arthropoda	Arachnida	Opiliones	Laniatores				Pegulius	parvulus		Roewer, 1949	Pegulius parvulus Roewer, 1949	species	Indomalayan	valid	Kury, Adriano B.
OPIL SP 0535	Checklist	Dataset	Animalia	Arthropoda	Arachnida	Opiliones	Laniatores				Peltamma	sumatranum		Roewer, 1927	Peltamma sumatranum Roewer, 1927	species	Indomalayan	valid	Kury, Adriano B.
OPIL SP 0536	Checklist	Dataset	Animalia	Arthropoda	Arachnida	Opiliones	Laniatores				Pentos	pygoplus		Roewer, 1952	Pentos pygoplus Roewer, 1952	species	Neotropical	valid	Kury, Adriano B.
OPIL SP 0537	Checklist	Dataset	Animalia	Arthropoda	Arachnida	Opiliones	Laniatores				Phalangodinus	surinamensis		Roewer, 1912	Phalangodinus surinamensis Roewer, 1912	species	Neotropical	valid	Kury, Adriano B.
OPIL SP 0538	Checklist	Dataset	Animalia	Arthropoda	Arachnida	Opiliones	Laniatores				Philacarus	samoides		Sørensen, 1932	Philacarus samoides Sørensen, 1932	species	Neotropical	valid	Kury, Adriano B.
OPIL SP 0539	Checklist	Dataset	Animalia	Arthropoda	Arachnida	Opiliones	Laniatores				Proscotolemon	sauteri	sauteri	Roewer, 1916	Proscotolemon sauteri sauteri Roewer, 1916	subspecies	Palearctic	valid	Kury, Adriano B.
OPIL SP 0540	Checklist	Dataset	Animalia	Arthropoda	Arachnida	Opiliones	Laniatores				Proscotolemon	sauteri	latens	Suzuki, 1973	Proscotolemon sauteri latens Suzuki, 1973	subspecies	Palearctic	valid	Kury, Adriano B.
OPIL SP 0541	Checklist	Dataset	Animalia	Arthropoda	Arachnida	Opiliones	Laniatores				Pseudomitraceras	brasiliense		Roewer, 1912	Pseudomitraceras brasiliense Roewer, 1912	species	Neotropical	valid	Kury, Adriano B.
OPIL SP 0542	Checklist	Dataset	Animalia	Arthropoda	Arachnida	Opiliones	Laniatores				Pseudomitraceras	curvatum		Goodnight & Goodnight, 1942	Pseudomitraceras curvatum Goodnight & Goodnight, 1942	species	Neotropical	valid	Kury, Adriano B.
OPIL SP 0543	Checklist	Dataset	Animalia	Arthropoda	Arachnida	Opiliones	Laniatores				Pseudomitraceras	minutum		Goodnight & Goodnight, 1942	Pseudomitraceras minutum Goodnight & Goodnight, 1942	species	Neotropical	valid	Kury, Adriano B.
OPIL SP 0544	Checklist	Dataset	Animalia	Arthropoda	Arachnida	Opiliones	Laniatores				Pucallpana	pullex		Avram & Soares, 1983	Pucallpana pullex Avram & Soares, 1983	species	Neotropical	valid	Kury, Adriano B.
OPIL SP 0545	Checklist	Dataset	Animalia	Arthropoda	Arachnida	Opiliones	Laniatores				Seblatus	coxalis		Roewer, 1949	Seblatus coxalis Roewer, 1949	species	Indomalayan	valid	Kury, Adriano B.
OPIL SP 0546	Checklist	Dataset	Animalia	Arthropoda	Arachnida	Opiliones	Laniatores				Sergitius	spiniger		Roewer, 1949	Sergitius spiniger Roewer, 1949	species	Australasian	valid	Kury, Adriano B.
OPIL SP 0547	Checklist	Dataset	Animalia	Arthropoda	Arachnida	Opiliones	Laniatores				Siryseus	tibialis		Roewer, 1949	Siryseus tibialis Roewer, 1949	species	Neotropical	valid	Kury, Adriano B.
OPIL SP 0548	Checklist	Dataset	Animalia	Arthropoda	Arachnida	Opiliones	Laniatores				Spalicus	oeditarsus		Roewer, 1949	Spalicus oeditarsus Roewer, 1949	species	Australasian	valid	Kury, Adriano B.
OPIL SP 0549	Checklist	Dataset	Animalia	Arthropoda	Arachnida	Opiliones	Laniatores				Spinolatum	mediale		Goodnight & Goodnight, 1942	Spinolatum mediale Goodnight & Goodnight, 1942	species	Neotropical	valid	Kury, Adriano B.
OPIL SP 0550	Checklist	Dataset	Animalia	Arthropoda	Arachnida	Opiliones	Laniatores				Stygnomimus	conopygus		Roewer, 1927	Stygnomimus conopygus Roewer, 1927	species	Indomalayan	valid	Kury, Adriano B.
OPIL SP 0551	Checklist	Dataset	Animalia	Arthropoda	Arachnida	Opiliones	Laniatores				Stygnomimus	malayensis		Suzuki, 1969	Stygnomimus malayensis Suzuki, 1969	species	Indomalayan	valid	Kury, Adriano B.
OPIL SP 0552	Checklist	Dataset	Animalia	Arthropoda	Arachnida	Opiliones	Laniatores				Tarmaops	koepckei		Roewer, 1956	Tarmaops koepckei Roewer, 1956	species	Neotropical	valid	Kury, Adriano B.
OPIL SP 0553	Checklist	Dataset	Animalia	Arthropoda	Arachnida	Opiliones	Laniatores				Turquinia	montana		Šilhavý, 1979	Turquinia montana Šilhavý, 1979	species	Neotropical	valid	Kury, Adriano B.
OPIL SP 0554	Checklist	Dataset	Animalia	Arthropoda	Arachnida	Opiliones	Laniatores				Tweedielus	brevipes		Roewer, 1949	Tweedielus brevipes Roewer, 1949	species	Indomalayan	valid	Kury, Adriano B.
OPIL SP 0555	Checklist	Dataset	Animalia	Arthropoda	Arachnida	Opiliones	Laniatores				Tweedielus	longipes		Roewer, 1933	Tweedielus longipes Roewer, 1933	species	Indomalayan	valid	Kury, Adriano B.
OPIL SP 0556	Checklist	Dataset	Animalia	Arthropoda	Arachnida	Opiliones	Laniatores				Valifema	blanda		Šilhavý, 1979	Valifema blanda Šilhavý, 1979	species	Neotropical	valid	Kury, Adriano B.
